# Supplementary material for: Screening and Activity Analysis of α-Glucosidase Inhibitory Peptides Derived from Coix Seed Prolamins Using Bioinformatics and Molecular Docking
Source: MDPI journal article supplement (doi:10.3390/foods12213970), 2023-10-30

# LFPSNPLA

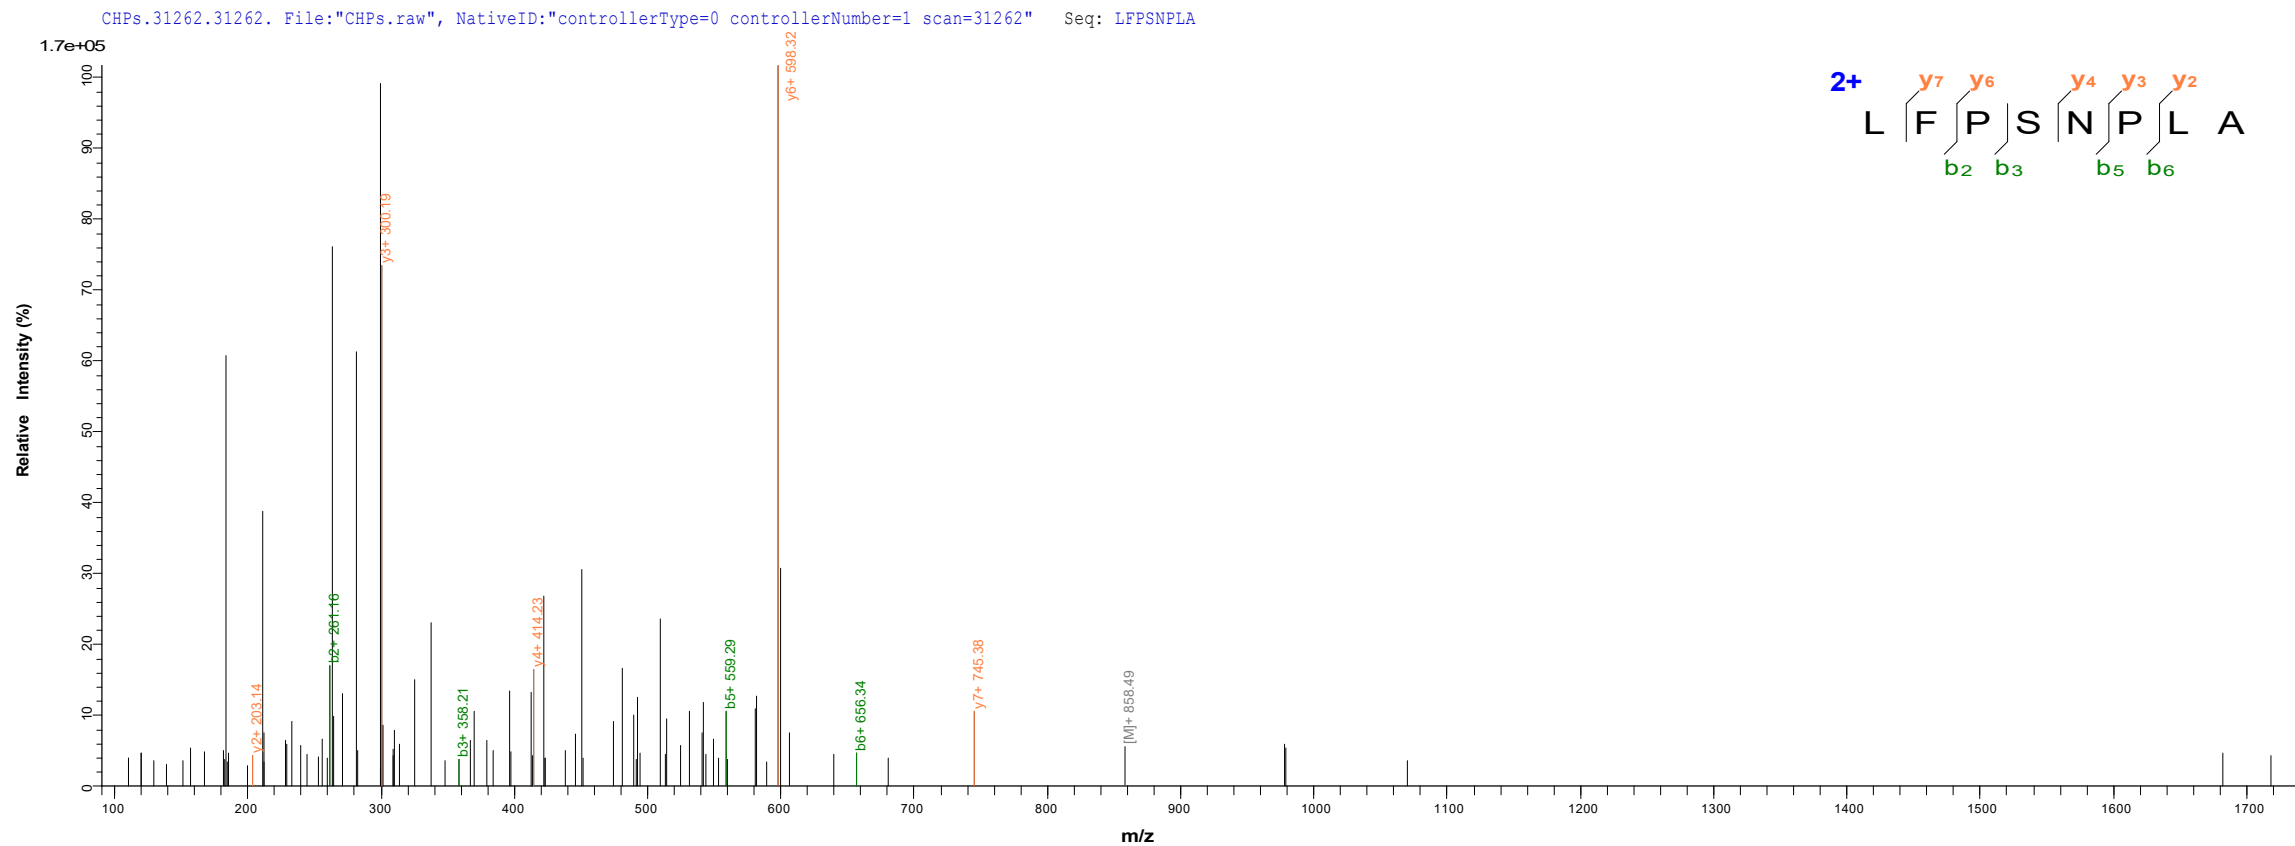

# FPCNPLVA

CHPs.29769.29769.1 File:"CHPs.raw", NativeID:"controllerType=0 controllerNumber=1 scan=29769" Seq: FPCNPLVA

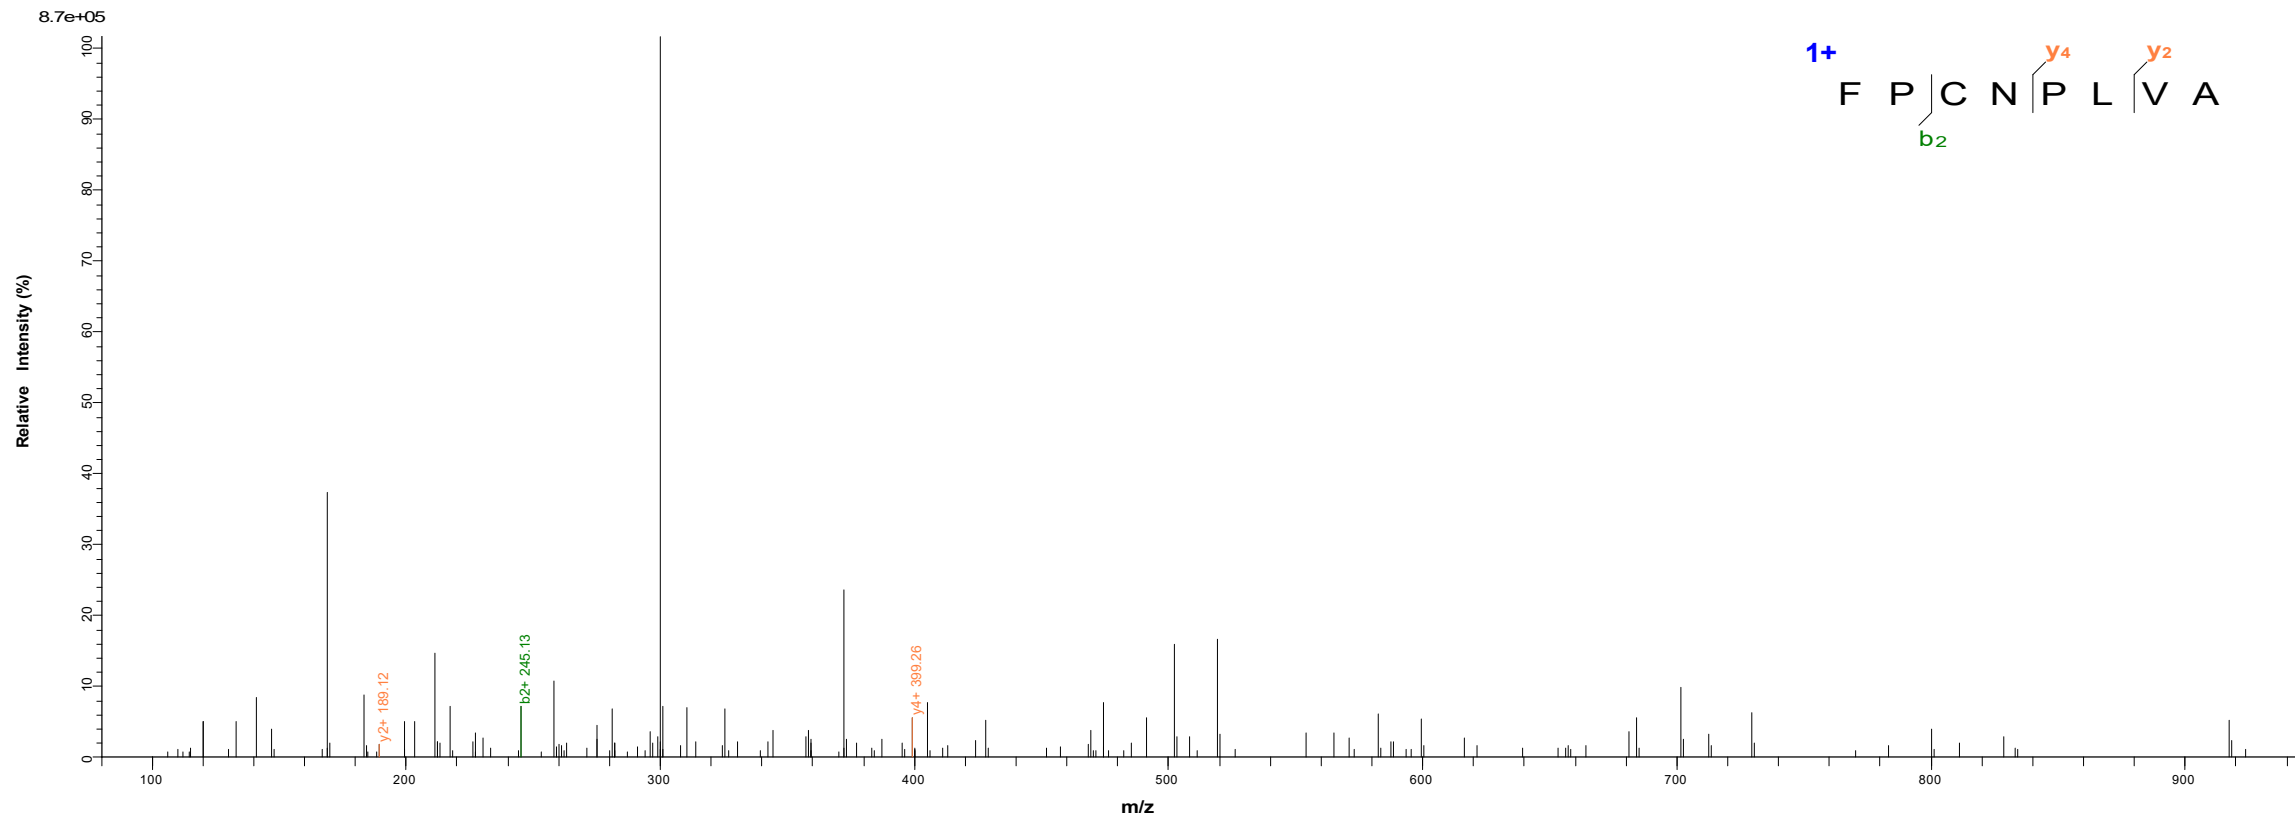

# FPCNPLVA

CHPs.30144.30144.1 File:"CHPs.raw", NativeID:"controllerType=0 controllerNumber=1 scan=30144" Seq: FPCNPLVA

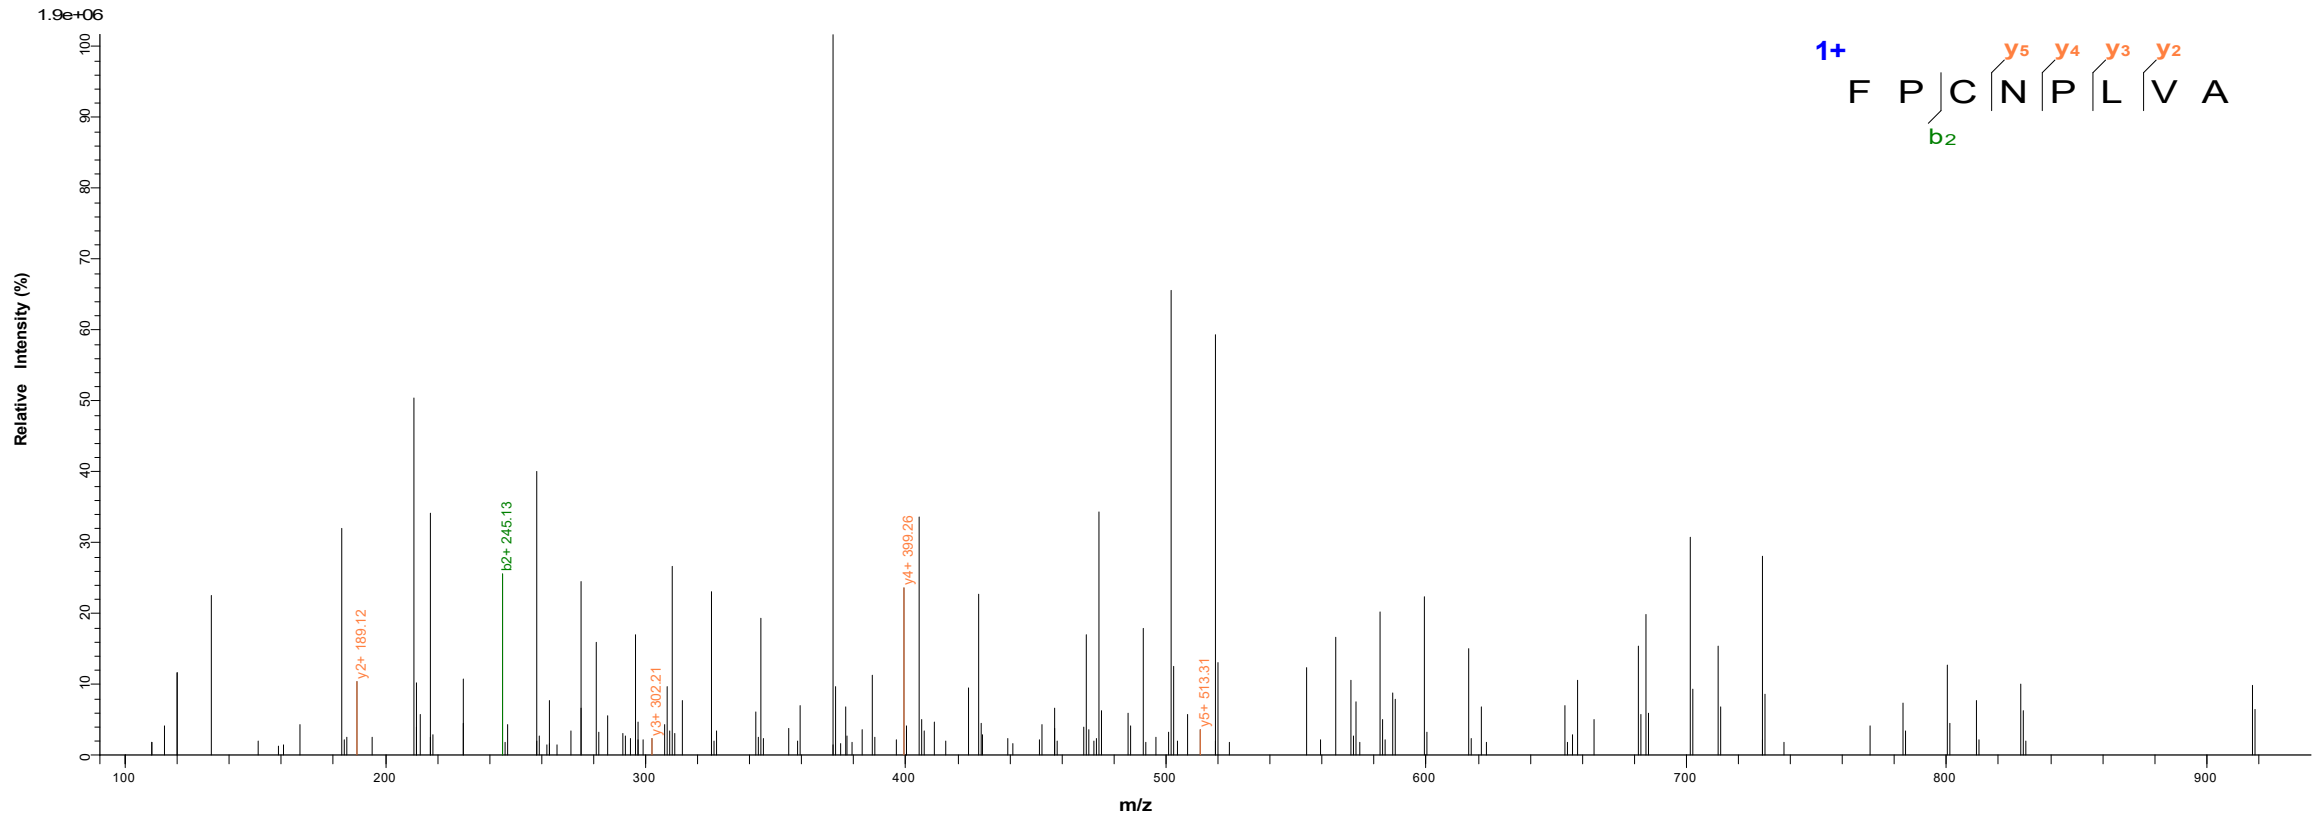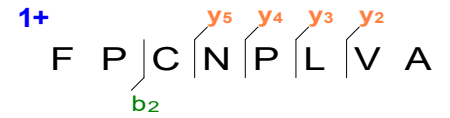

# HLPFNPQ

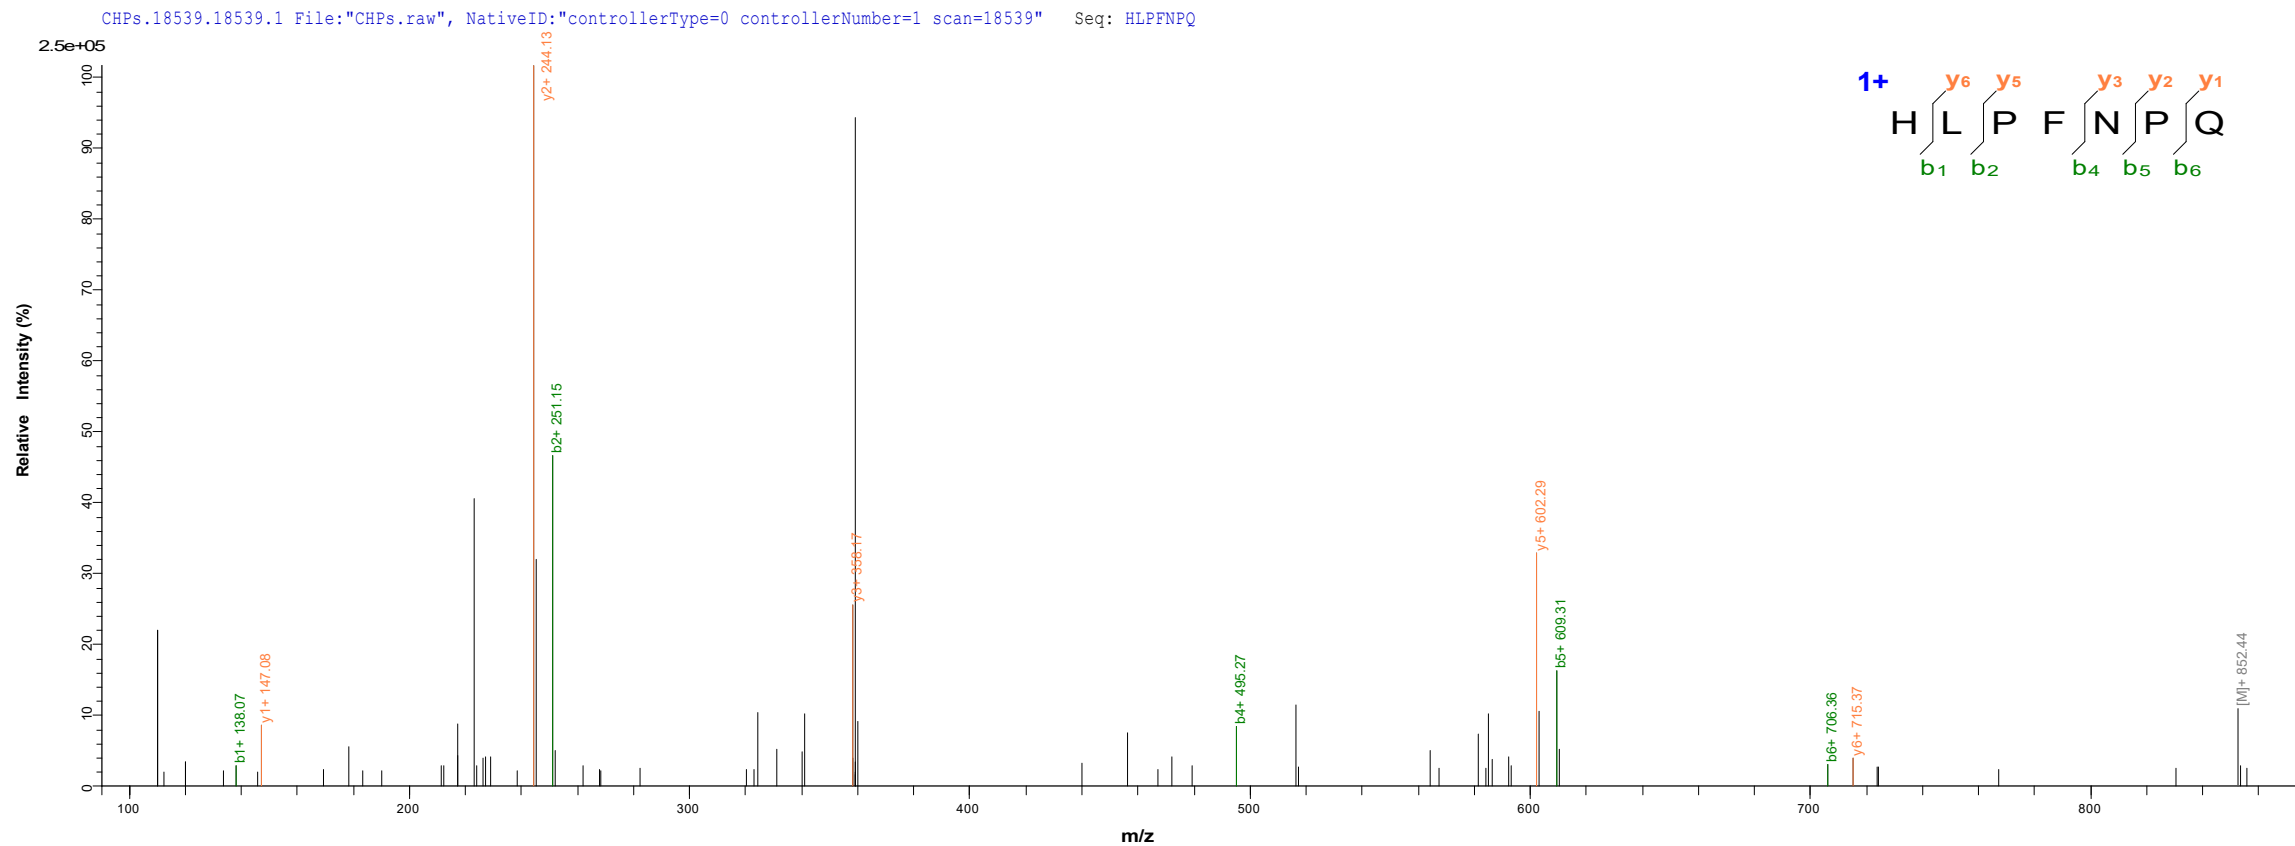

# HLPFNPQ

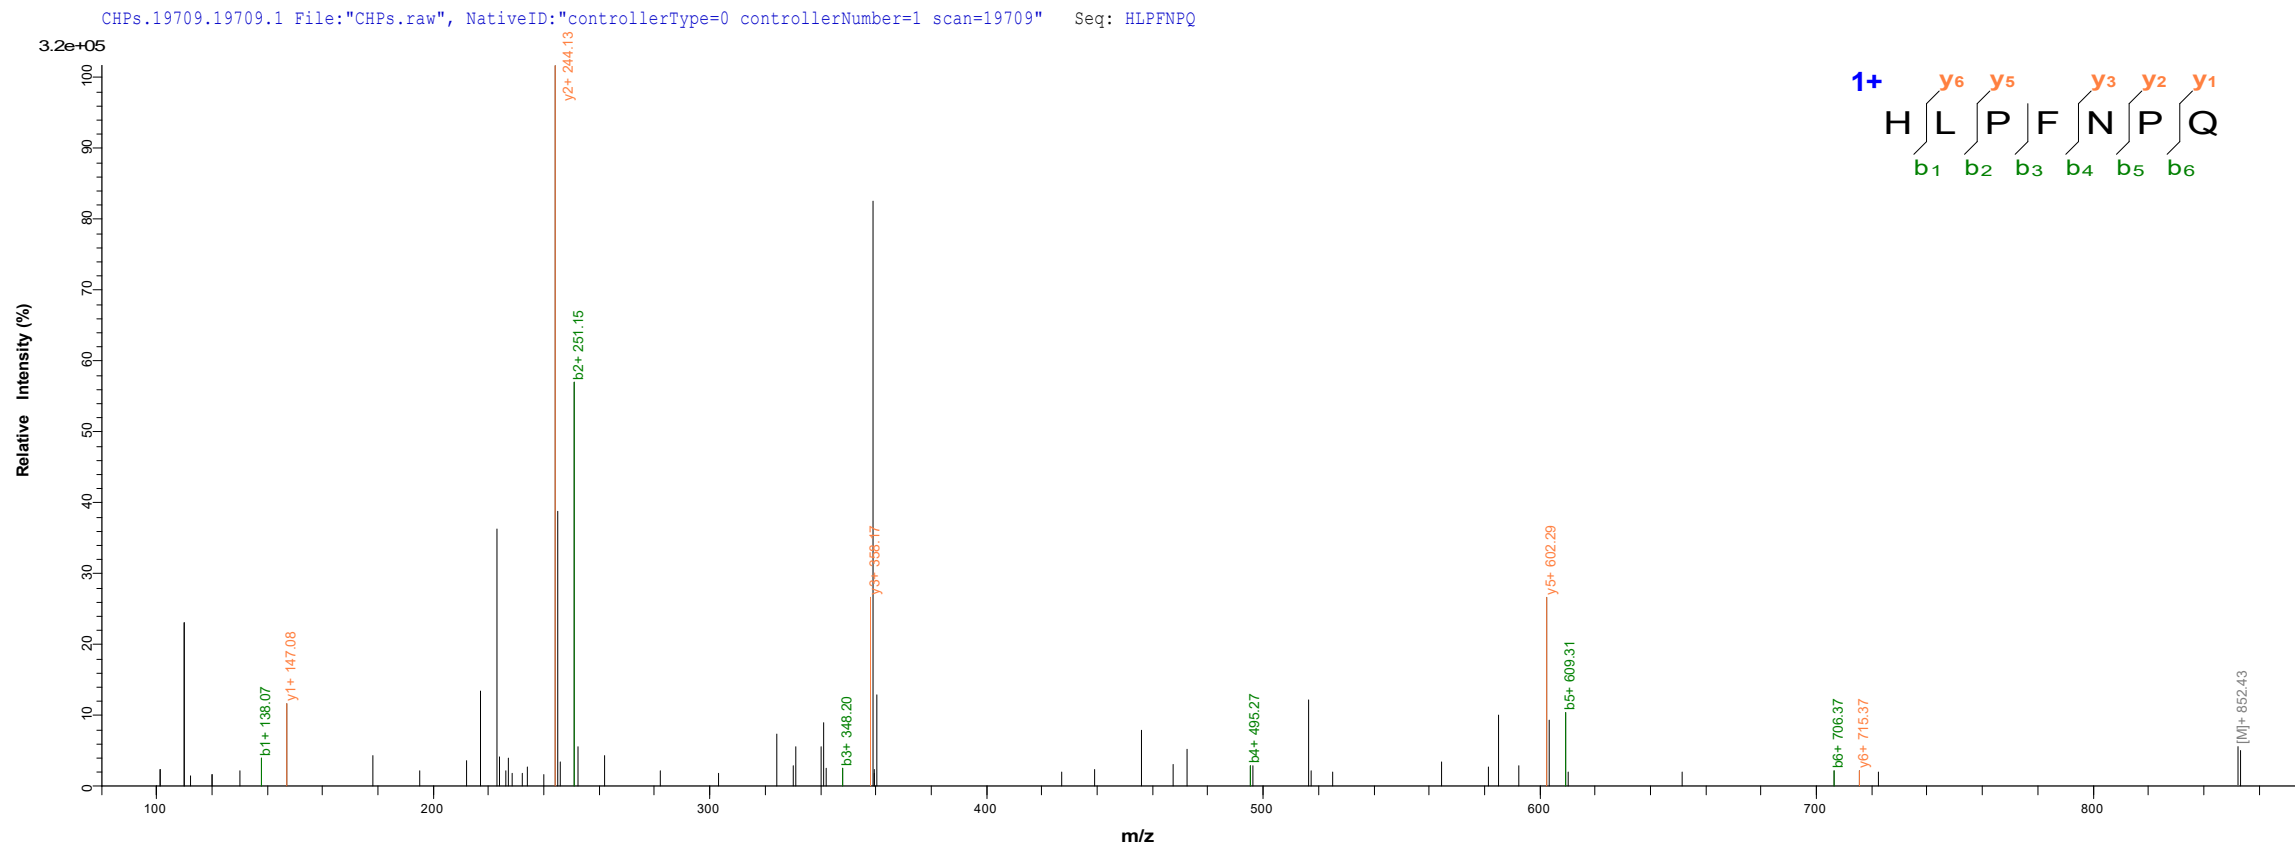

# HLPFNPQ

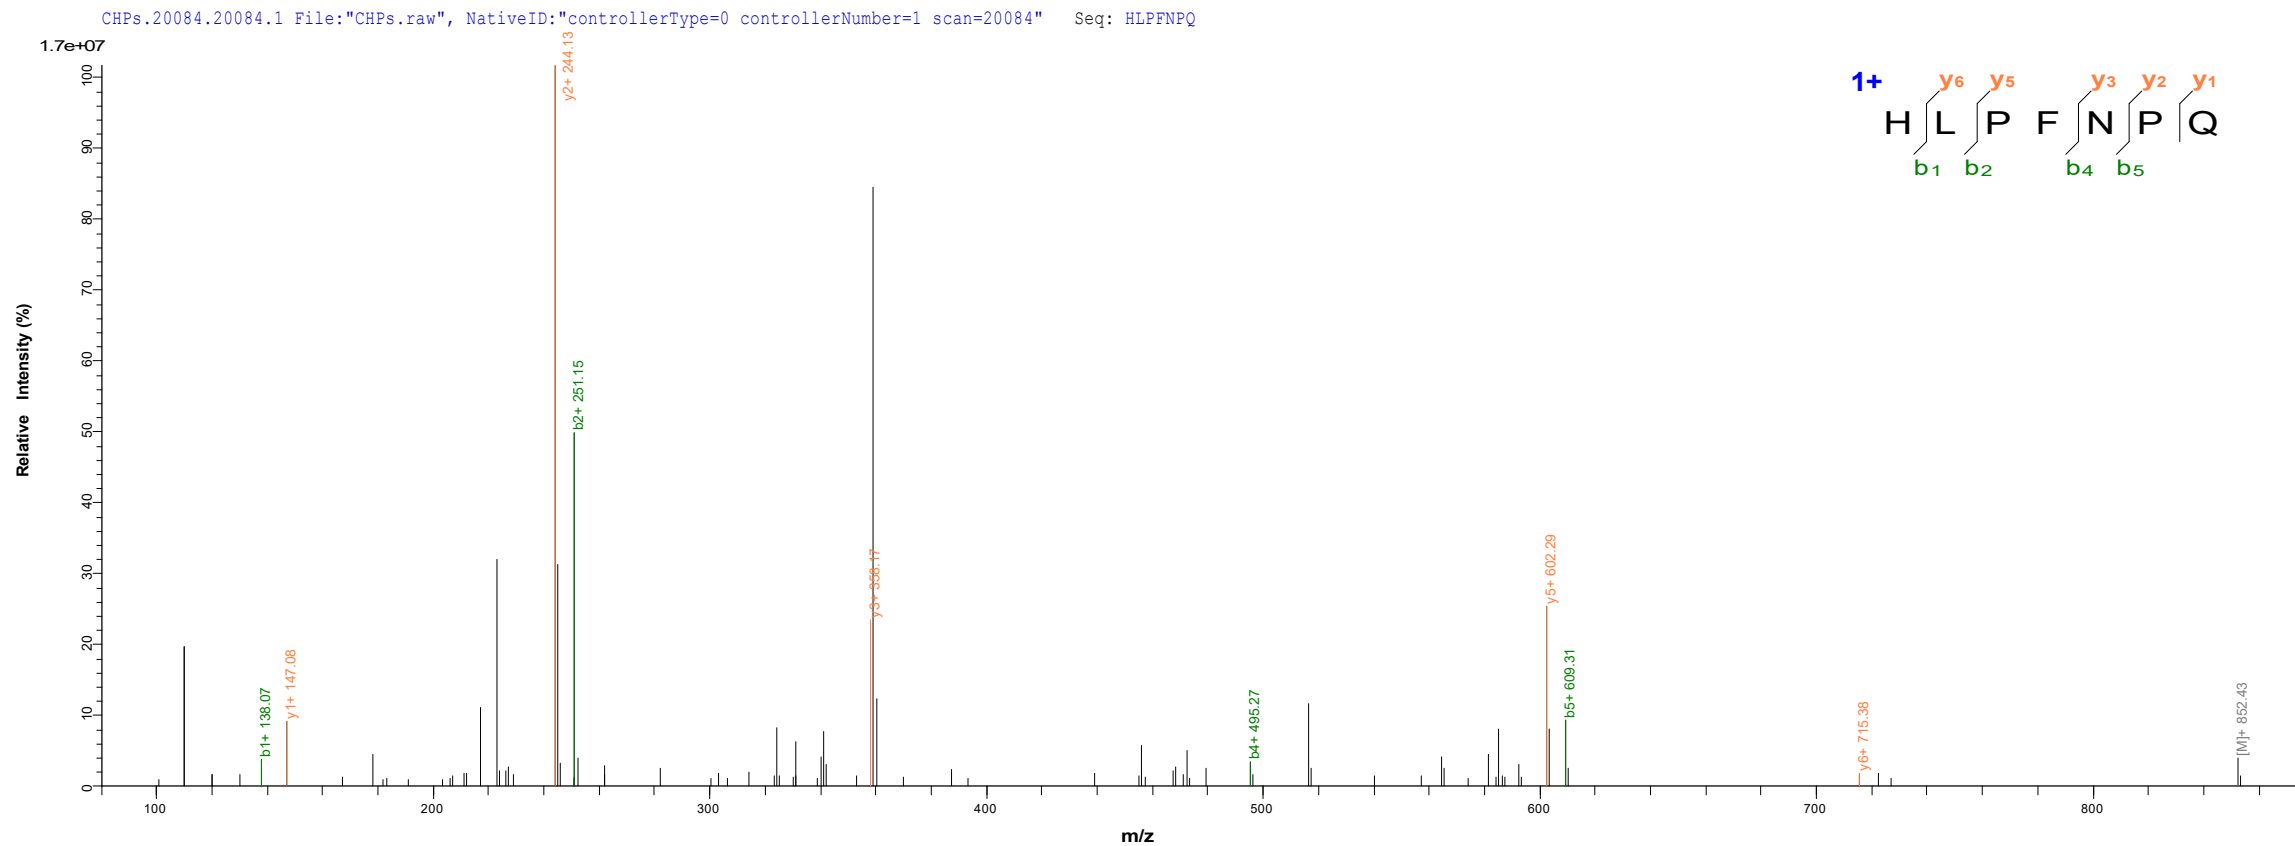

# LLPFYPN

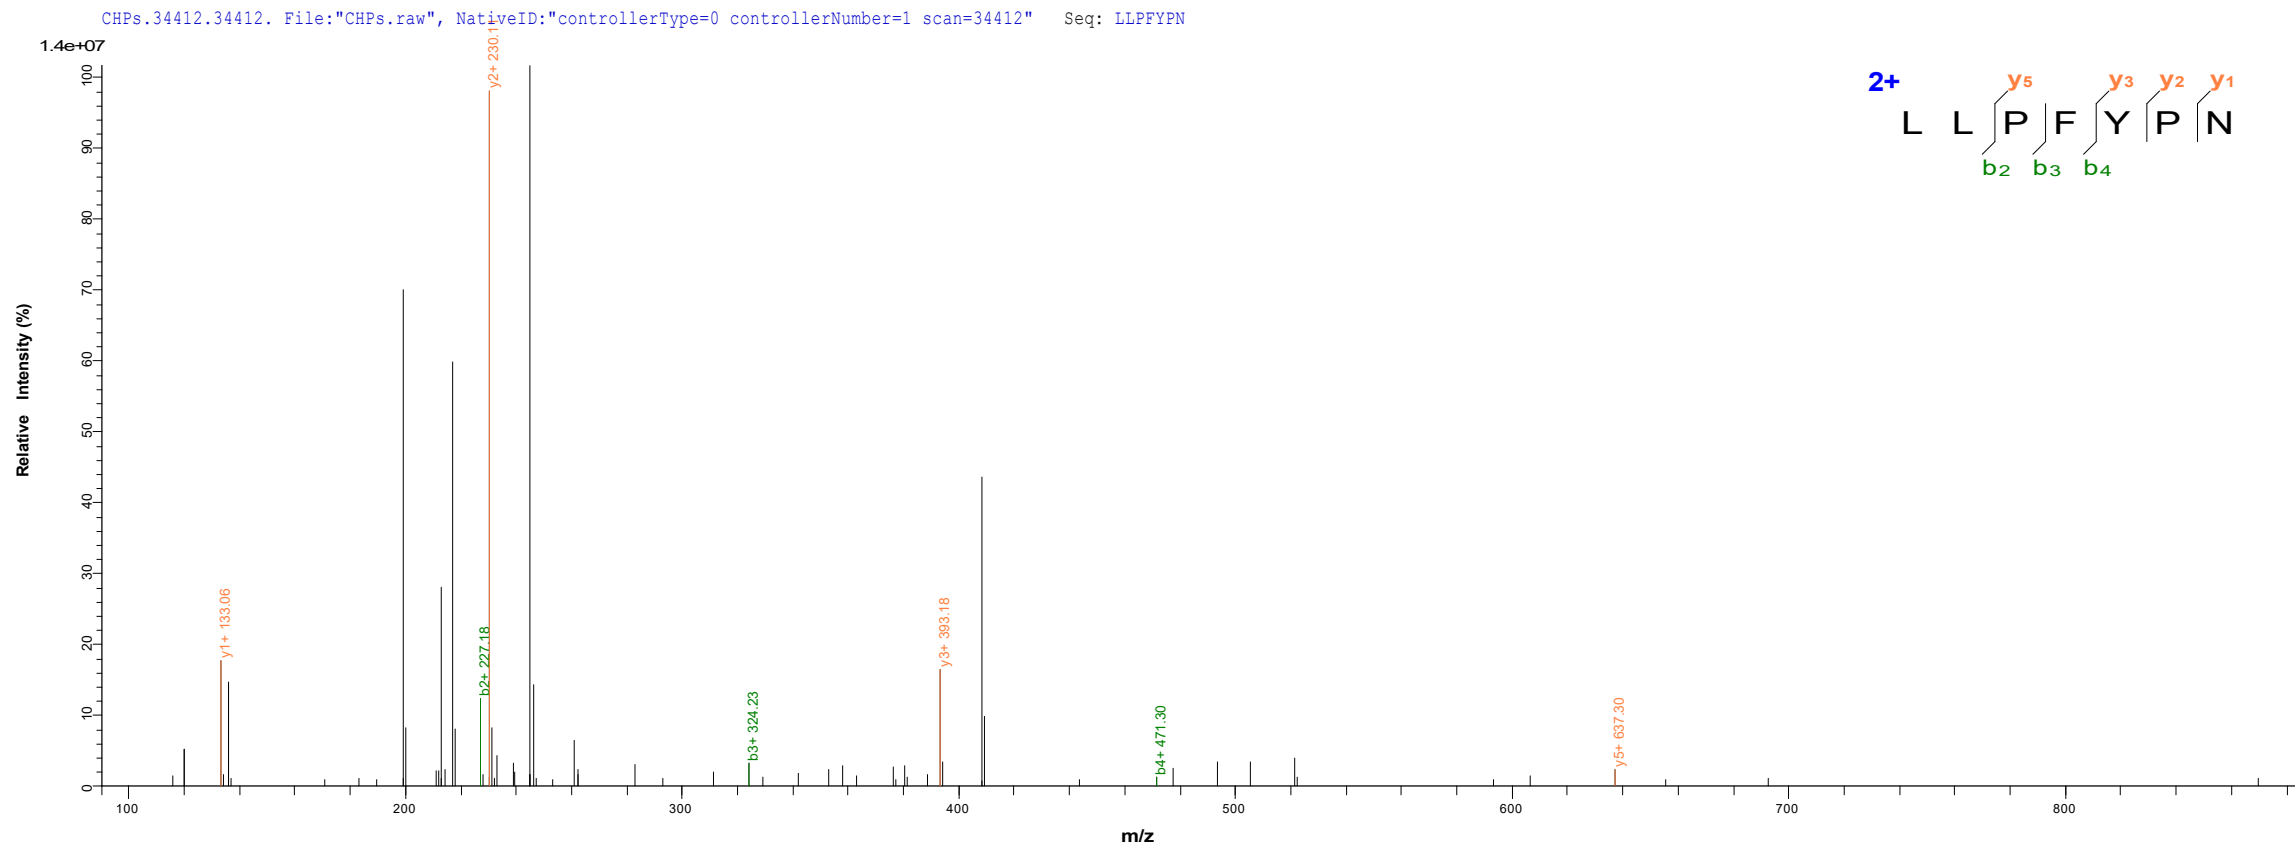

# LLPFYPN

CHPs.34553.34553.1 File:"CHPs.raw", NativeID:"controllerType=0 controllerNumber=1 scan=34553" Seq: LLPFYPN

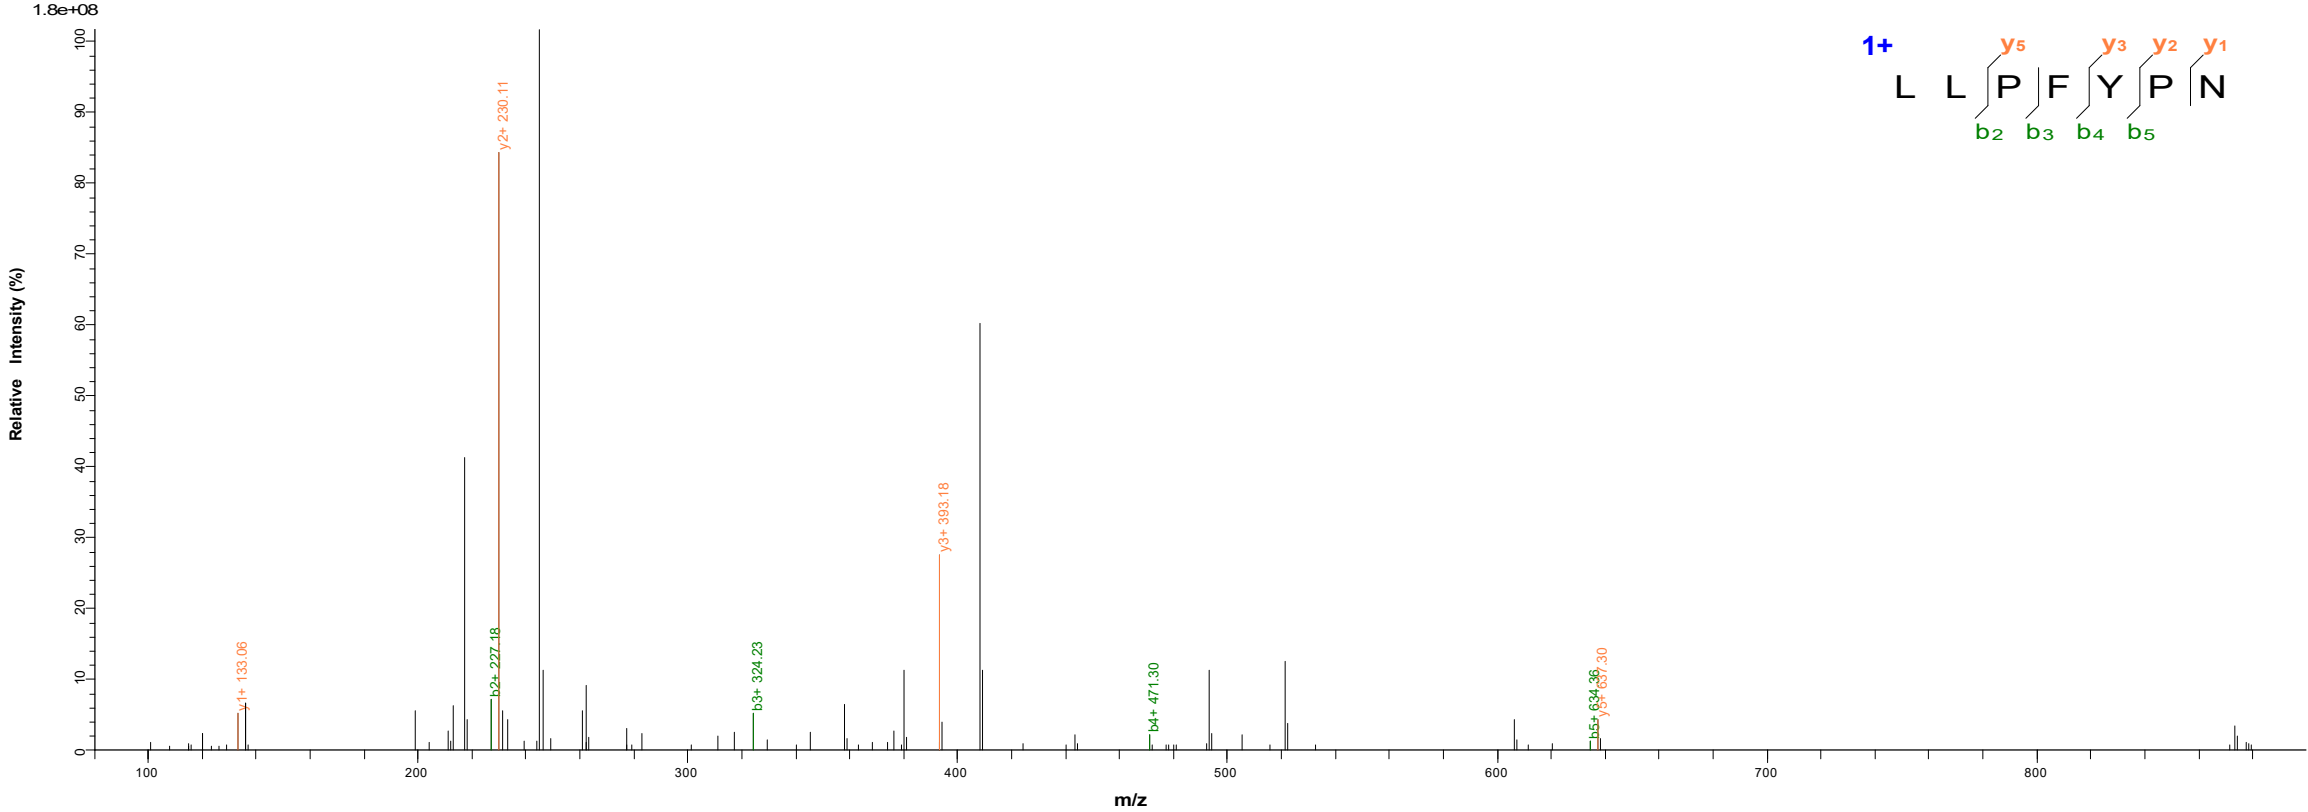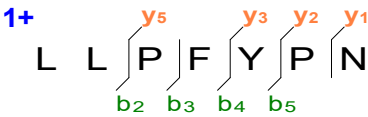



# LLPFYPN

CHPs.34931.34931.1 File:"CHPs.raw", NativeID:"controllerType=0 controllerNumber=1 scan=34931" Seq: LLPFYPN

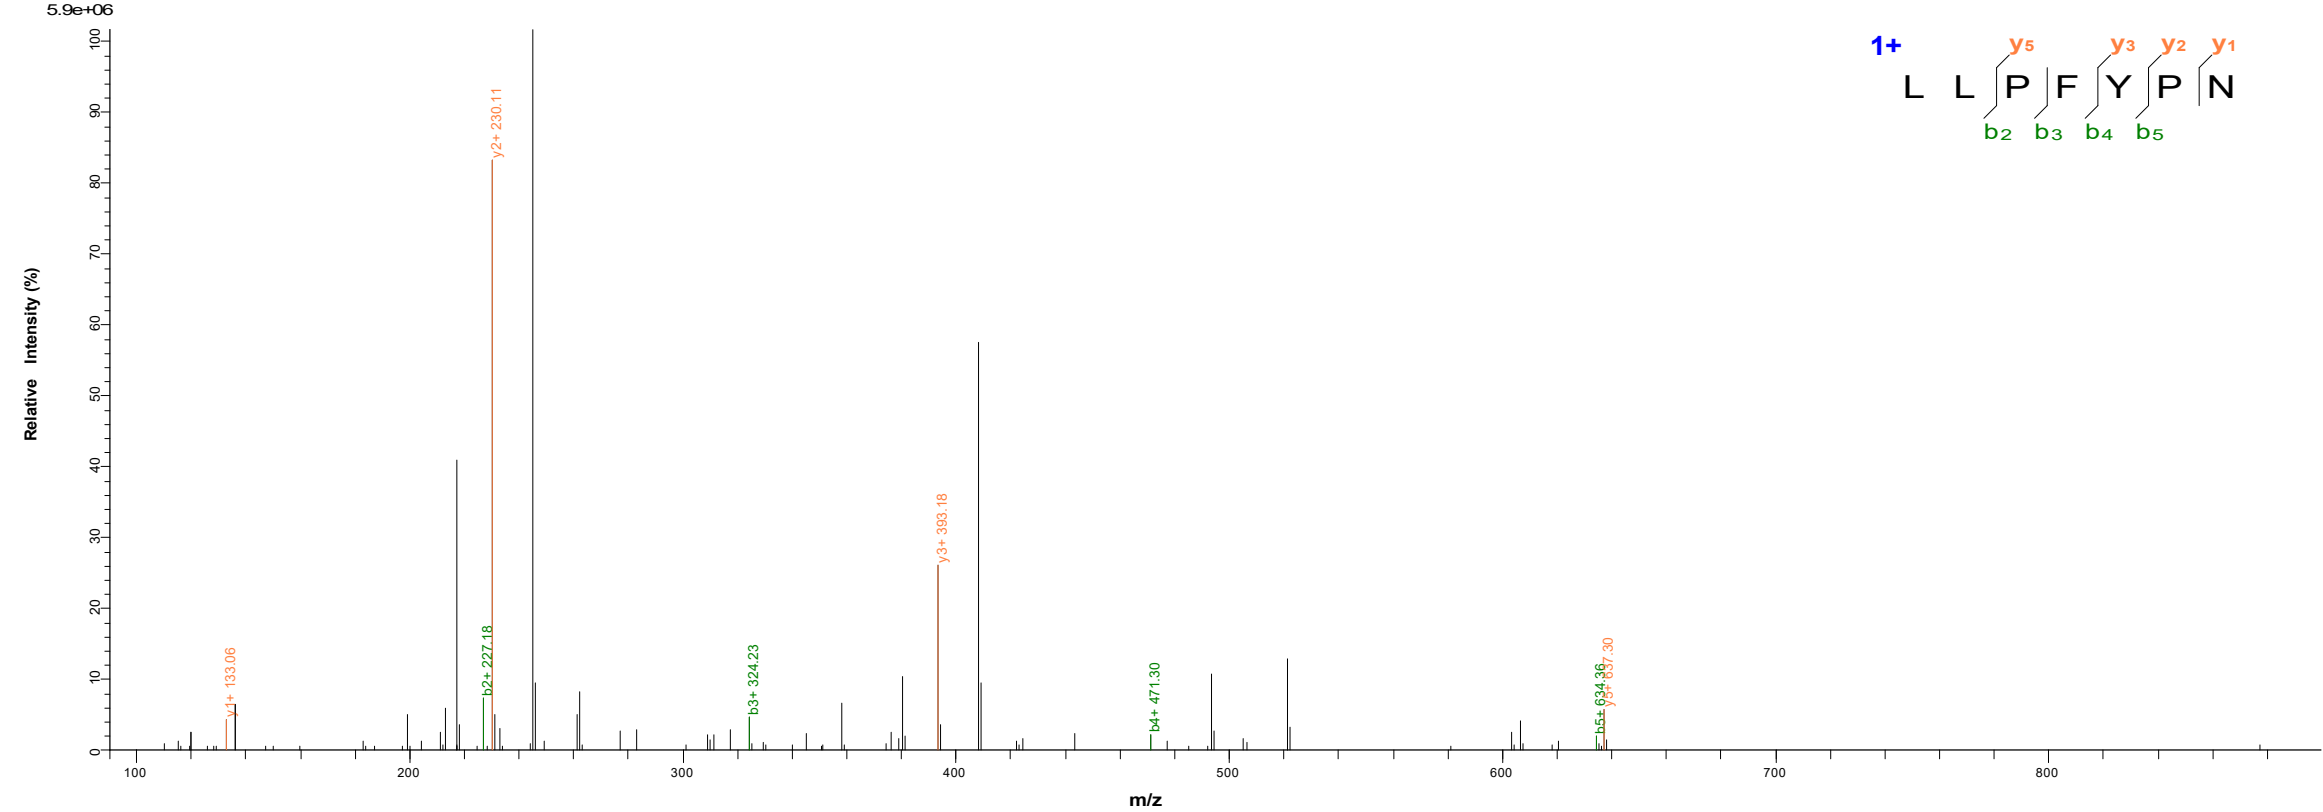

# FLSPF

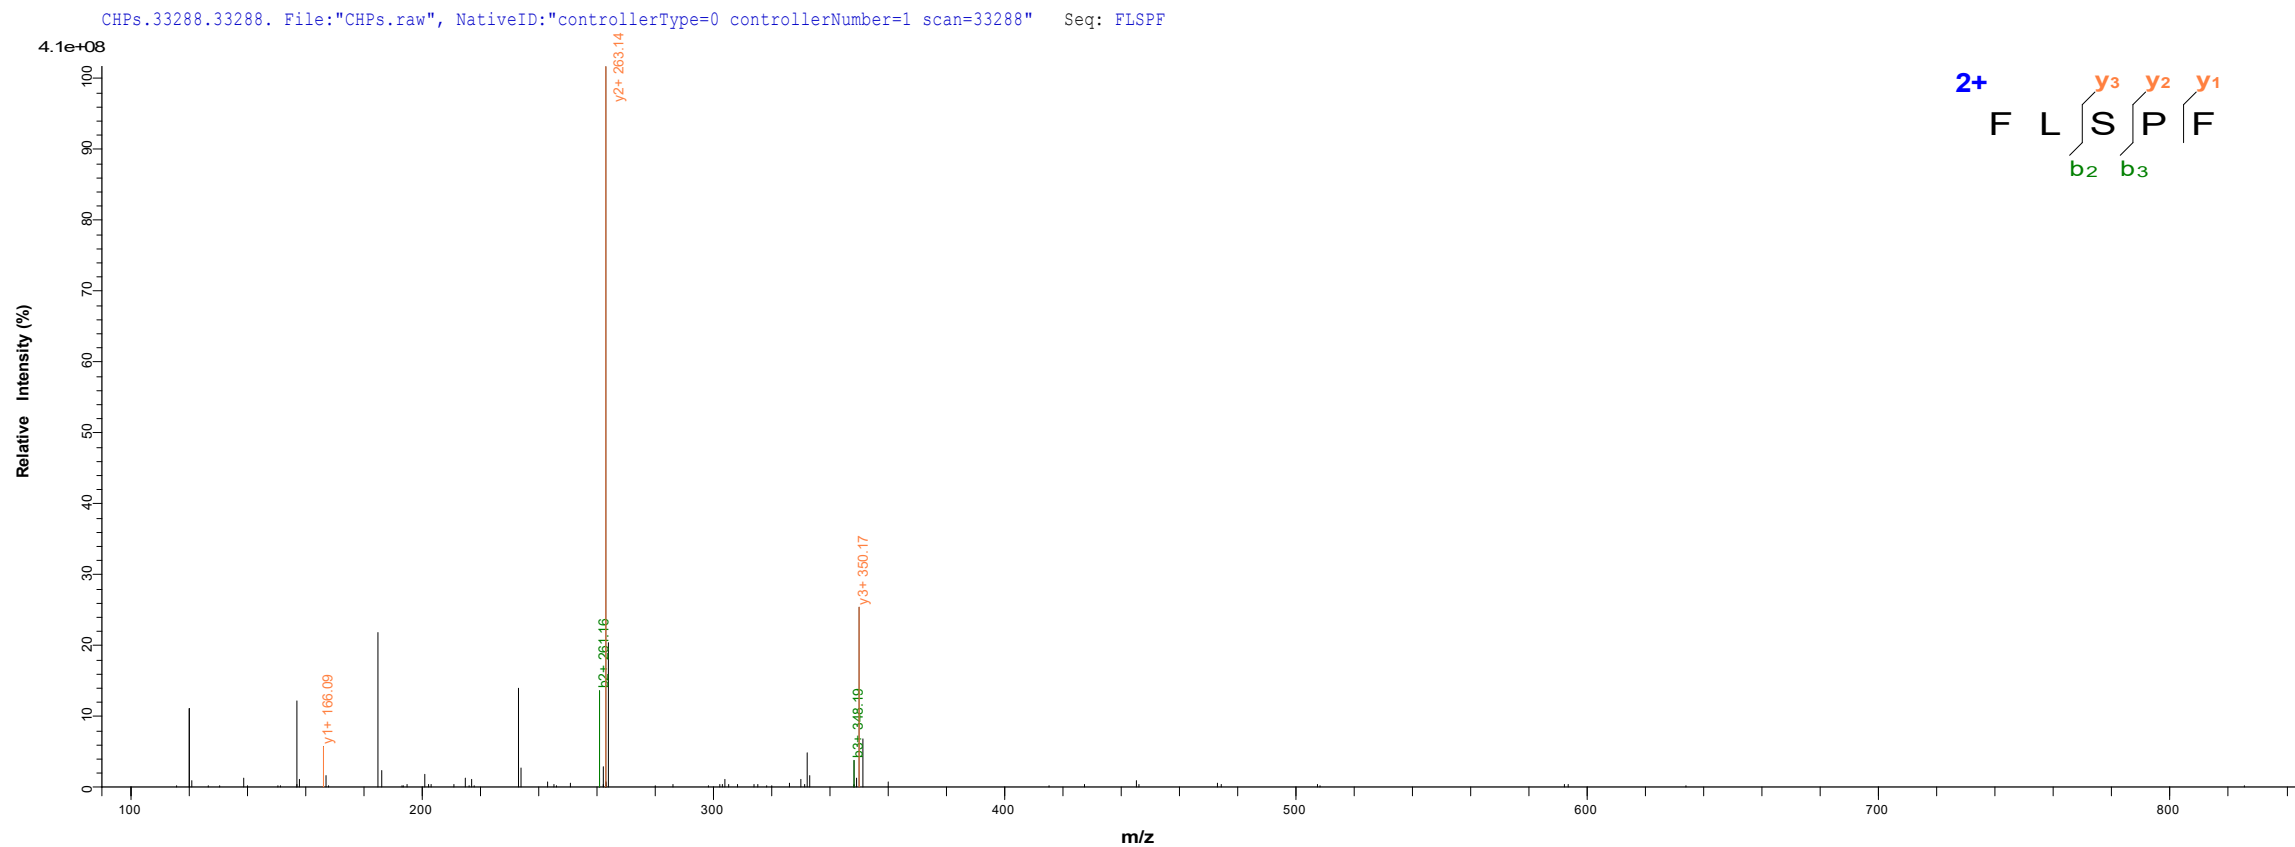

# FPCNPLVA

CHPs.29769.29769.1 File:"CHPs.raw", NativeID:"controllerType=0 controllerNumber=1 scan=29769" Seq: FPCNPLVA

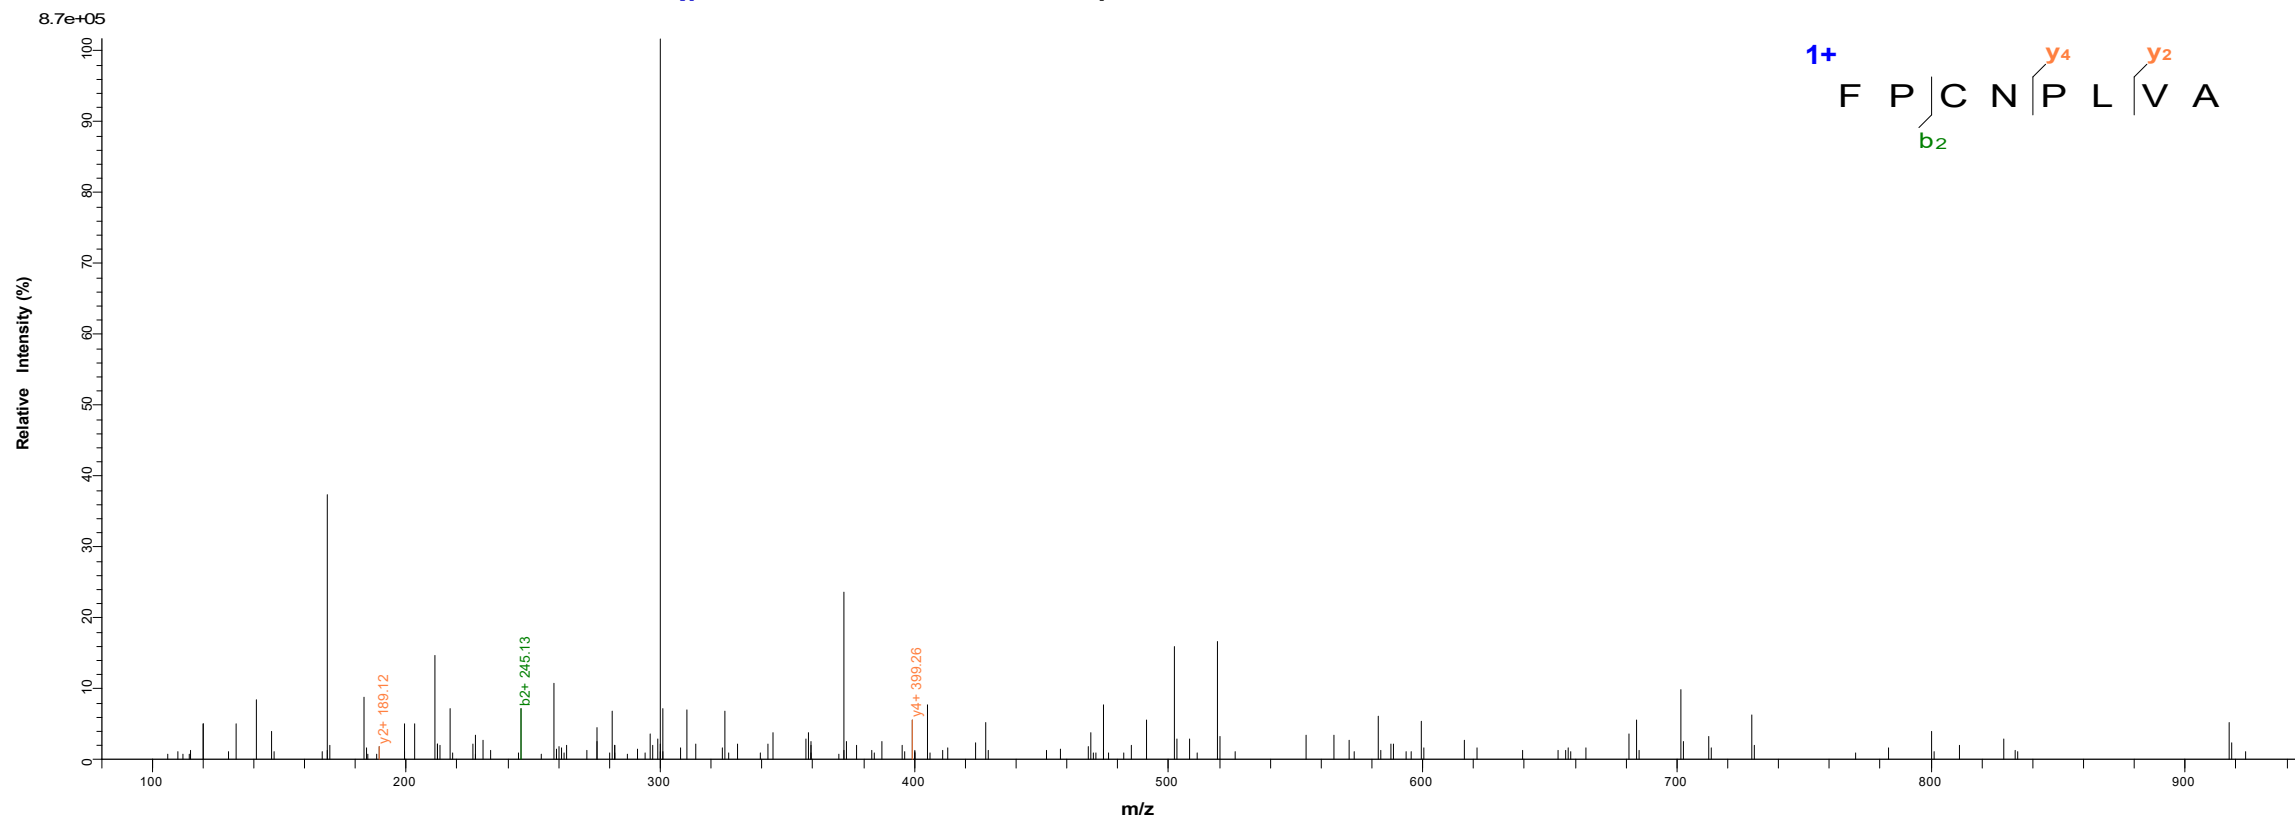

# FPCNPLVA

CHPs.30144.30144.1 File:"CHPs.raw", NativeID:"controllerType=0 controllerNumber=1 scan=30144" Seq: FPCNPLVA



# LPPFLPS

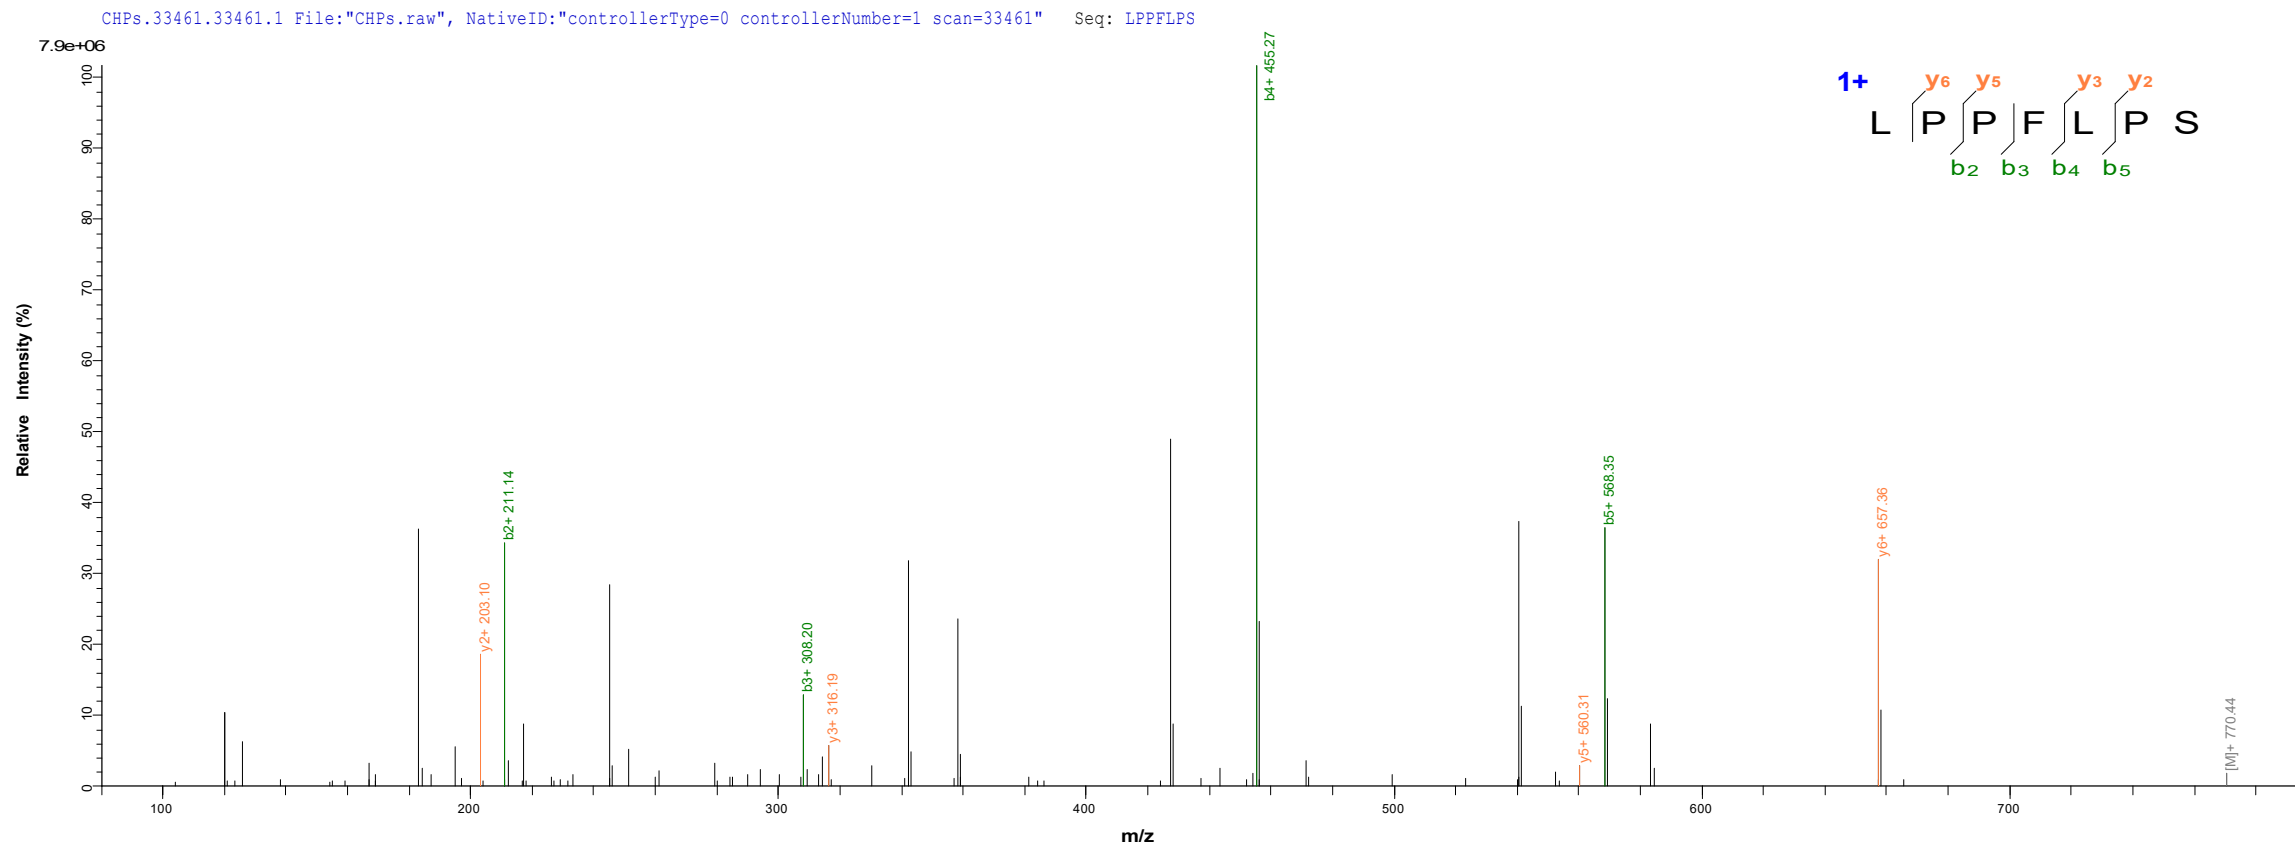

# QLFPSNPLA

CHPs.33370.33370. File:"CHPs.raw", NativeID:"controllerType=0 controllerNumber=1 scan=33370" Seq: QLFPSNPLA

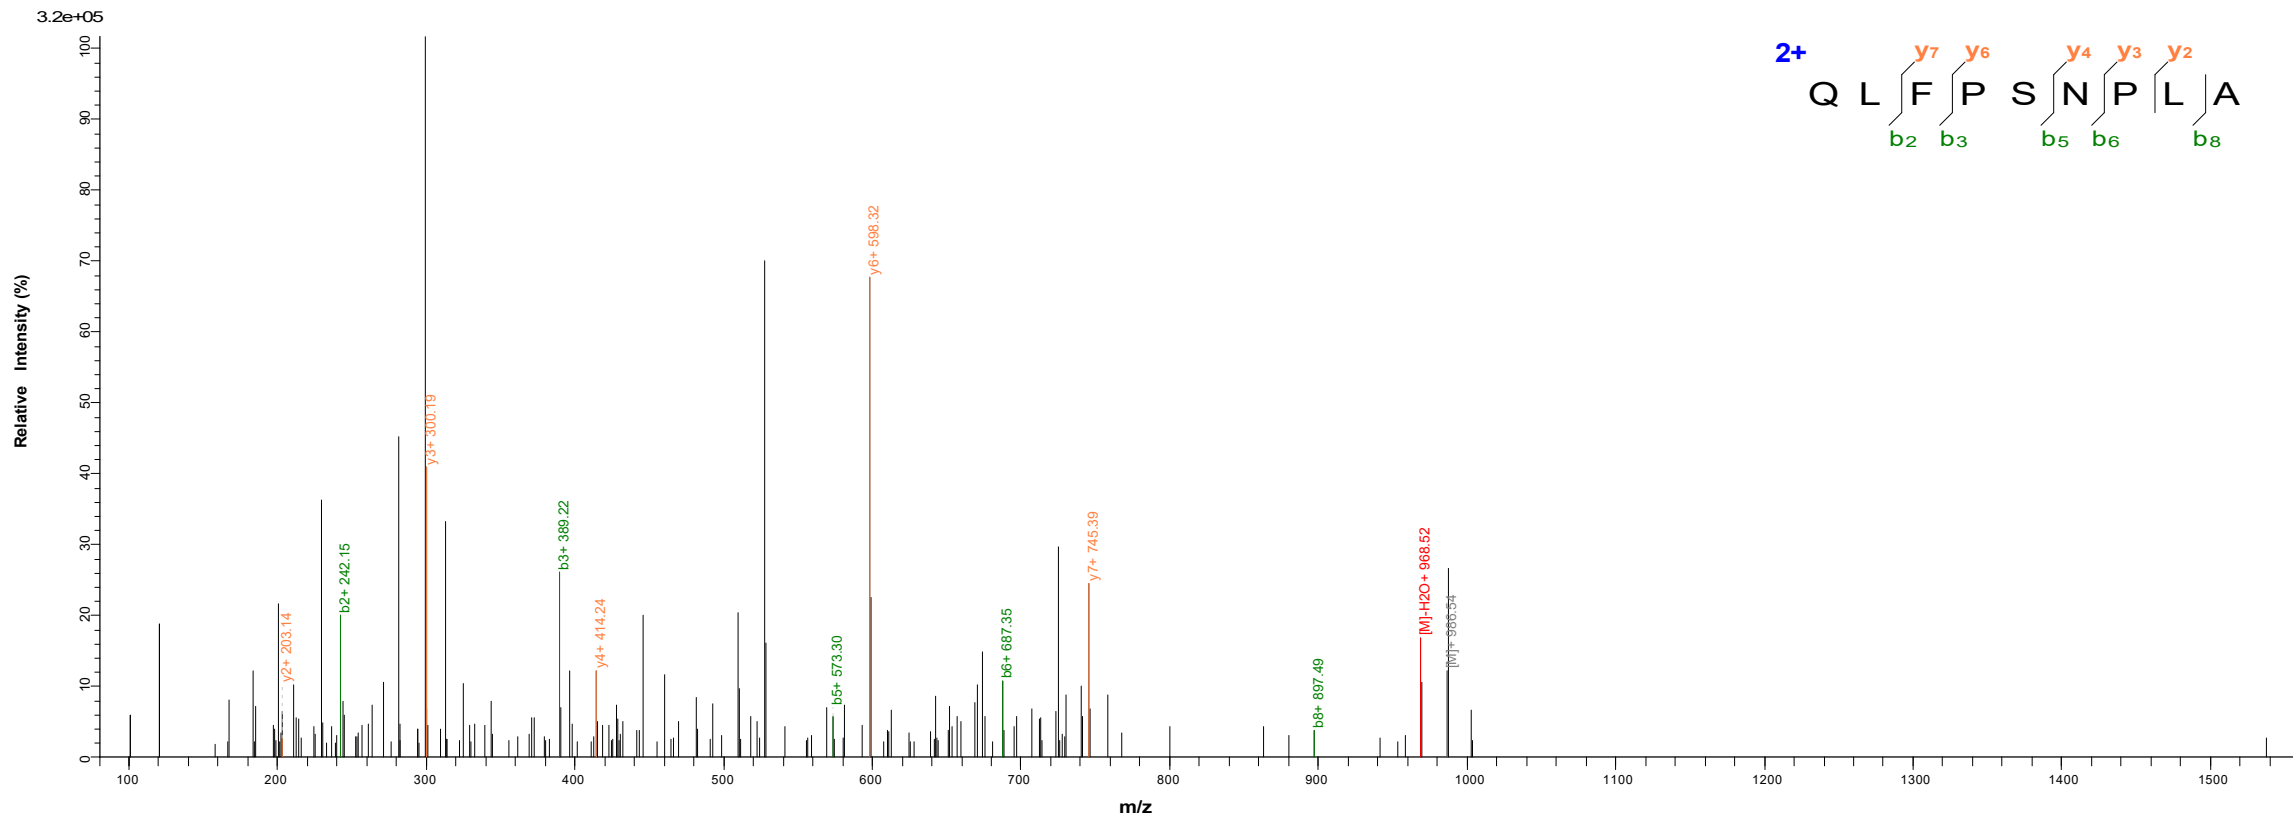

# QQHLFPNPQ

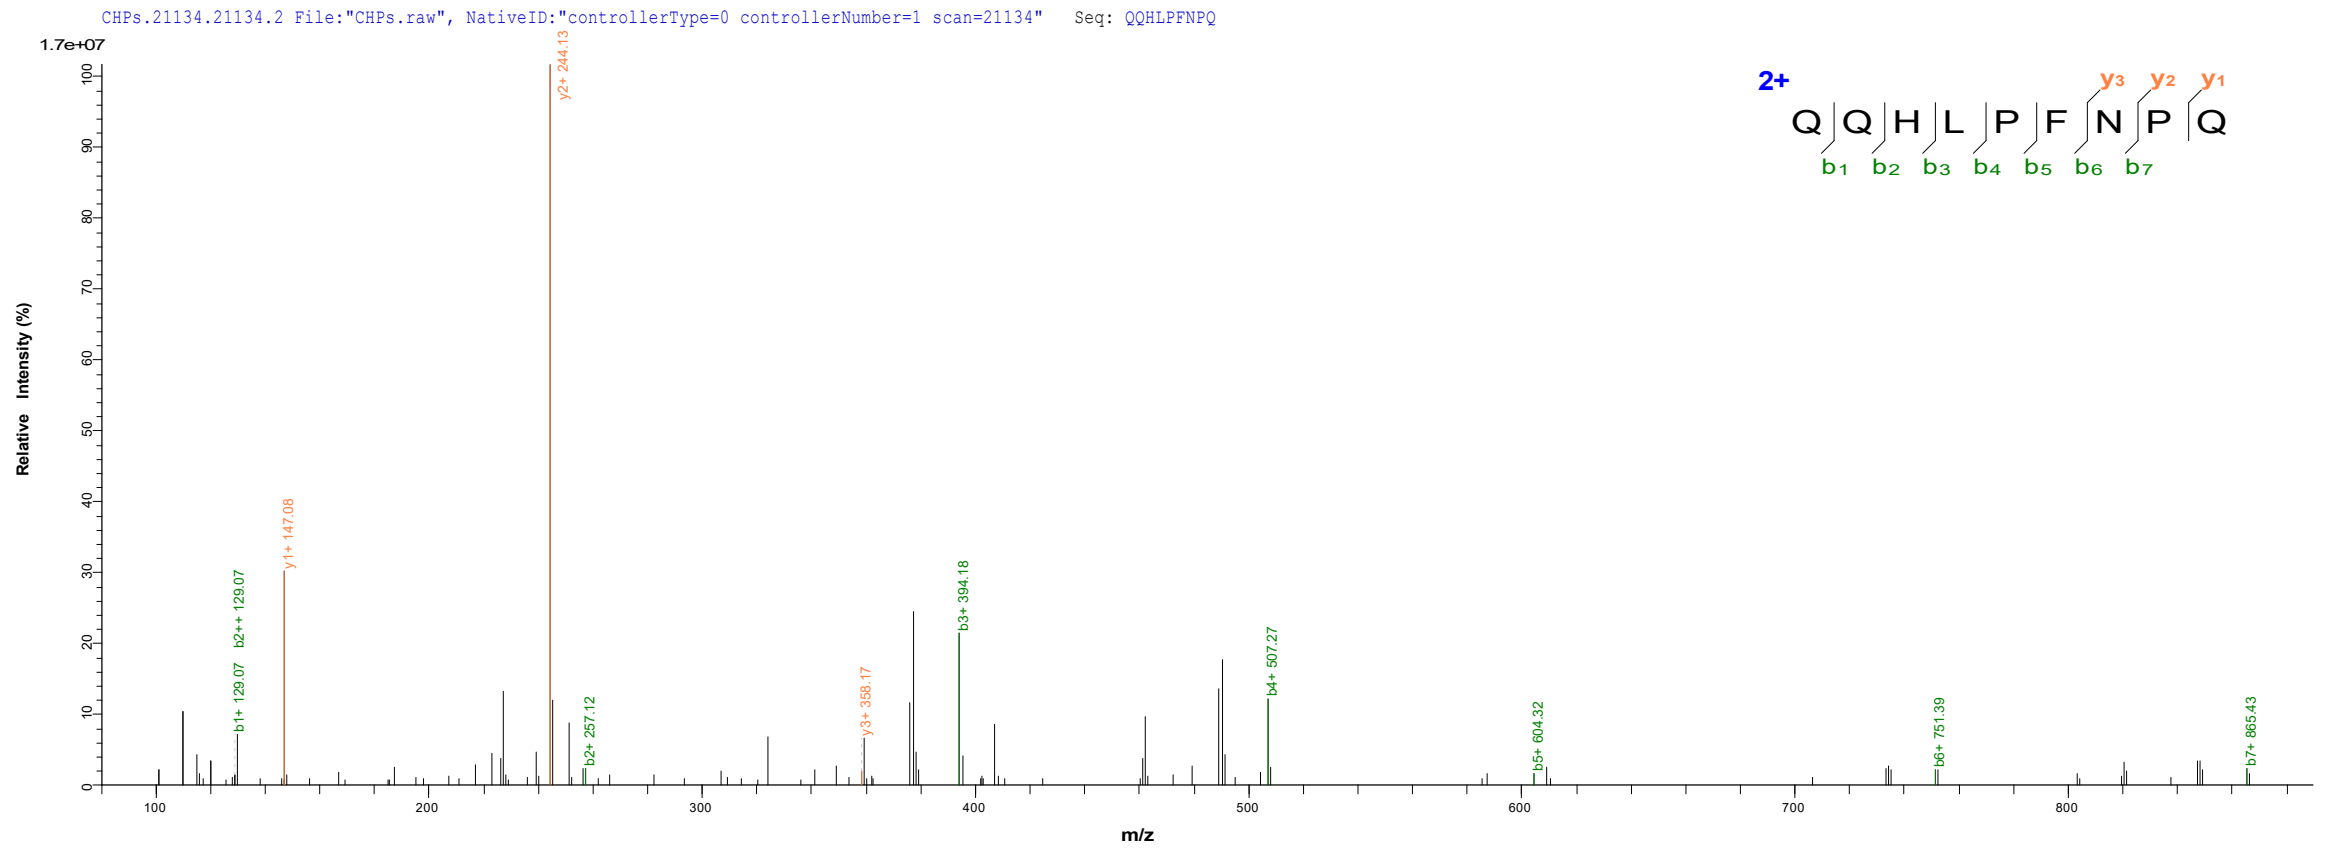

# QQHLFPNPQ

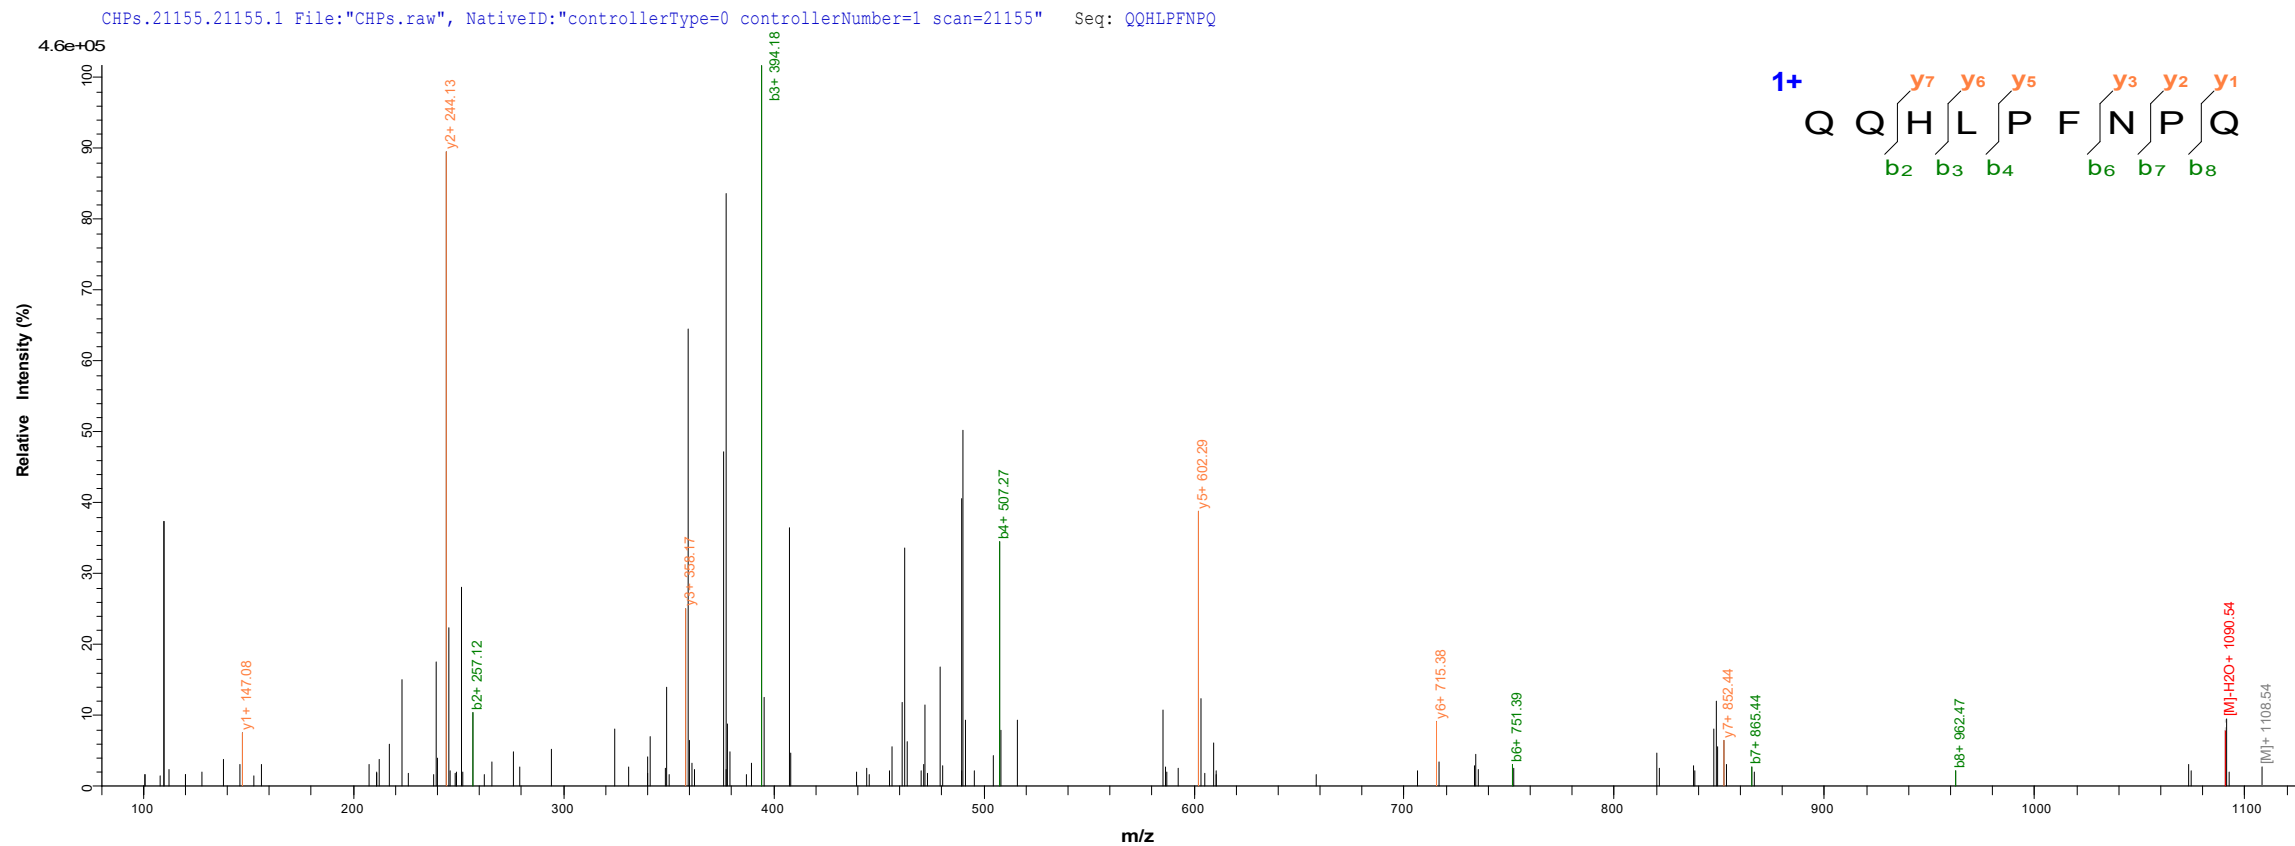



# SWQQPIVGR

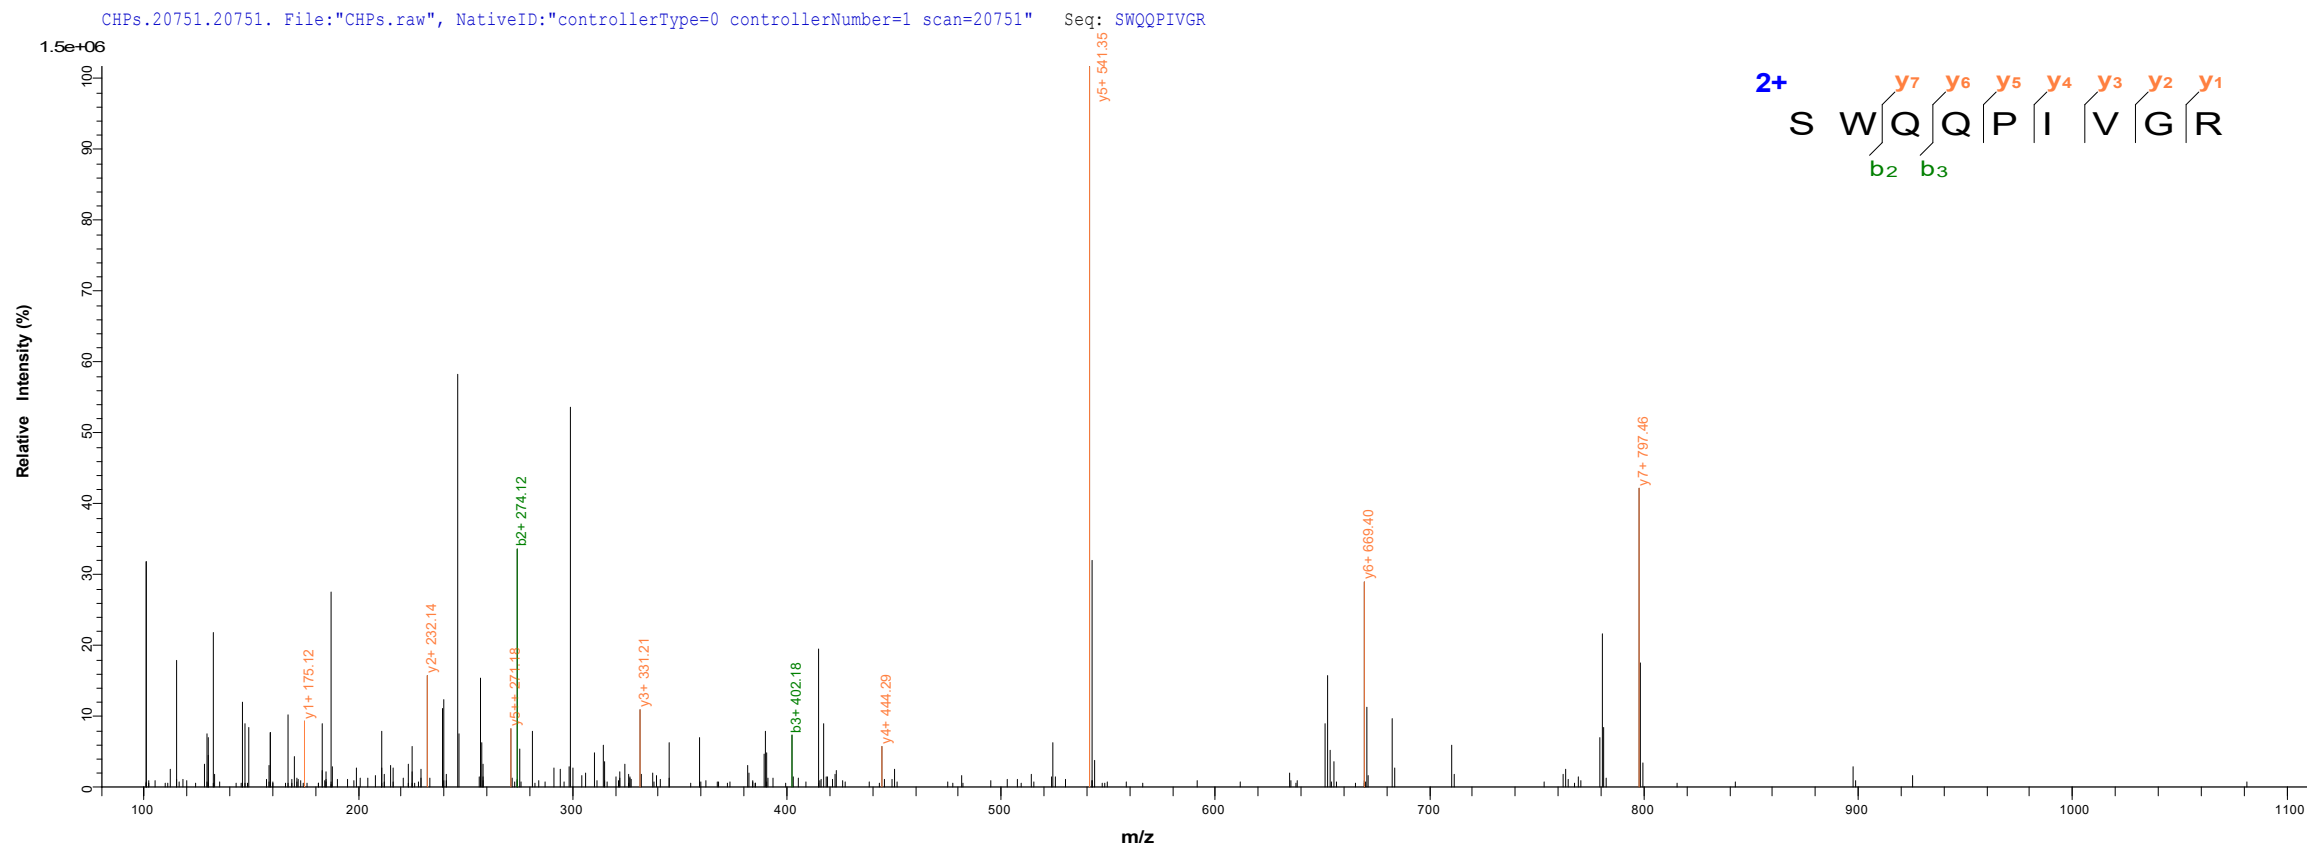

# SWQQPIVGR

CHPs.20778.20778. File:"CHPs.raw", NativeID:"controllerType=0 controllerNumber=1 scan=20778" Seq: SWQQPIVGR

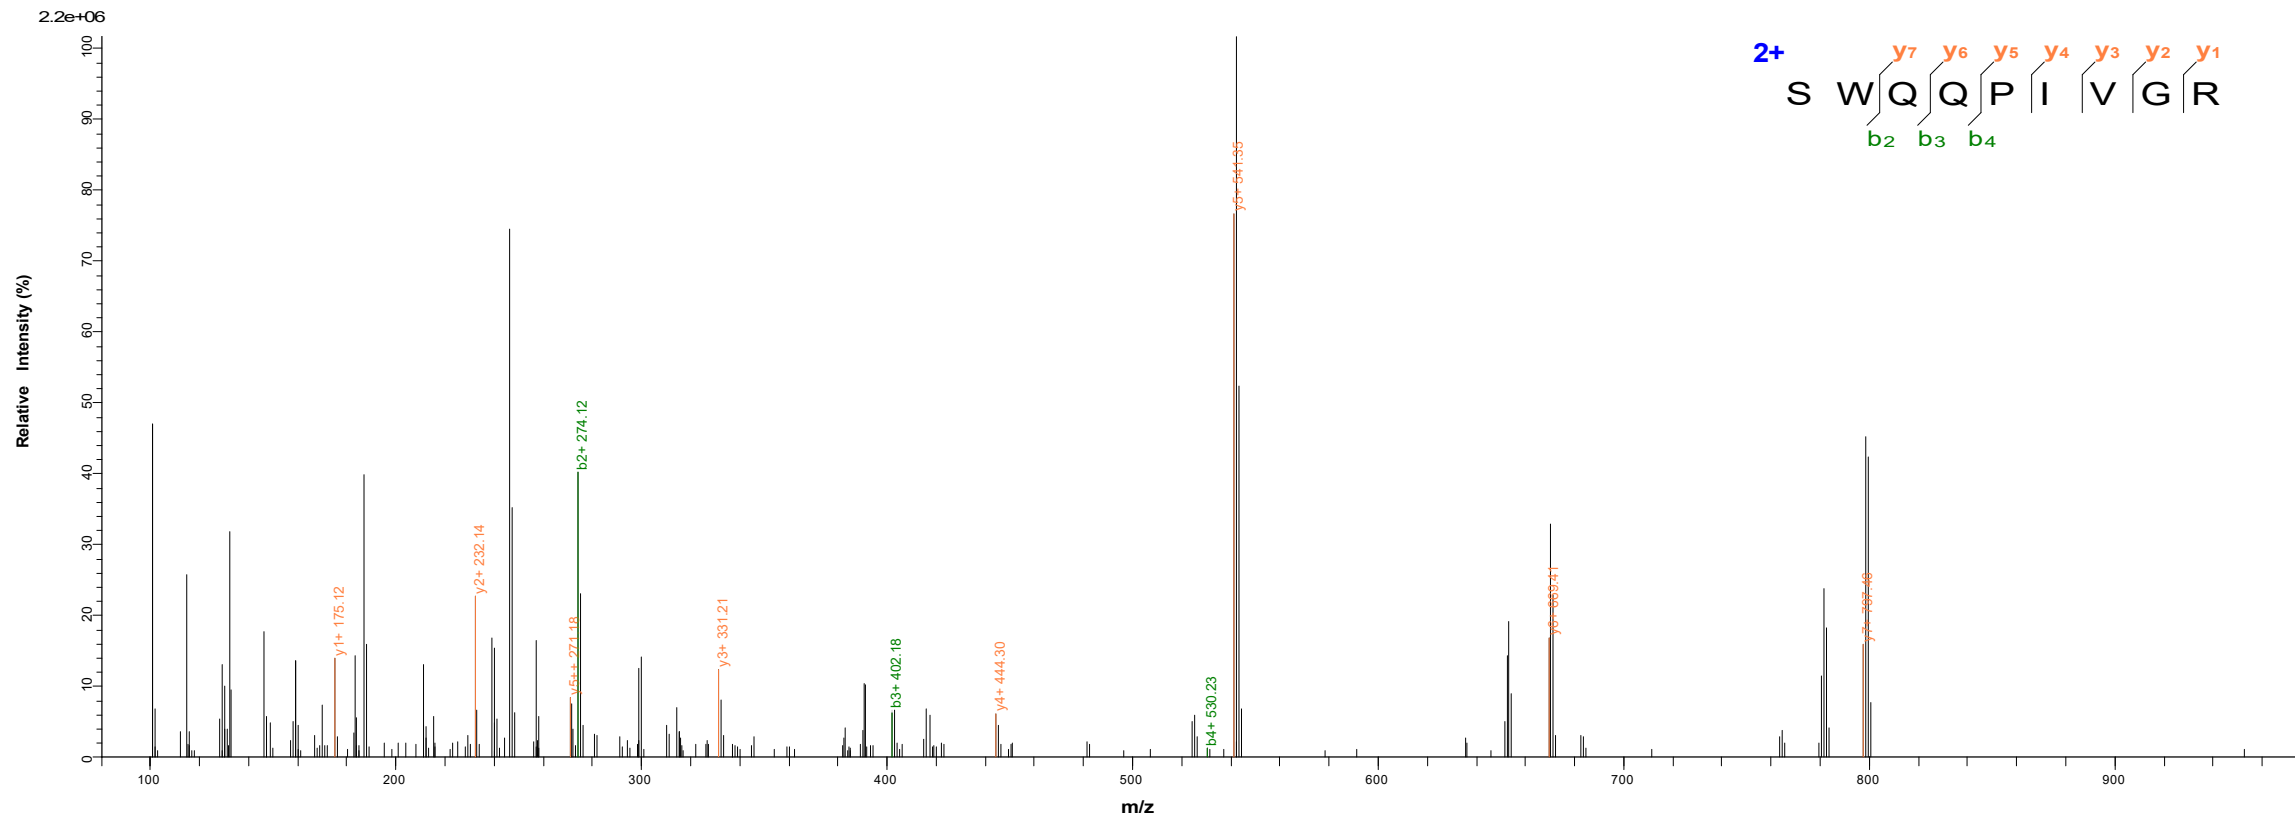

# SWQQPIVGR

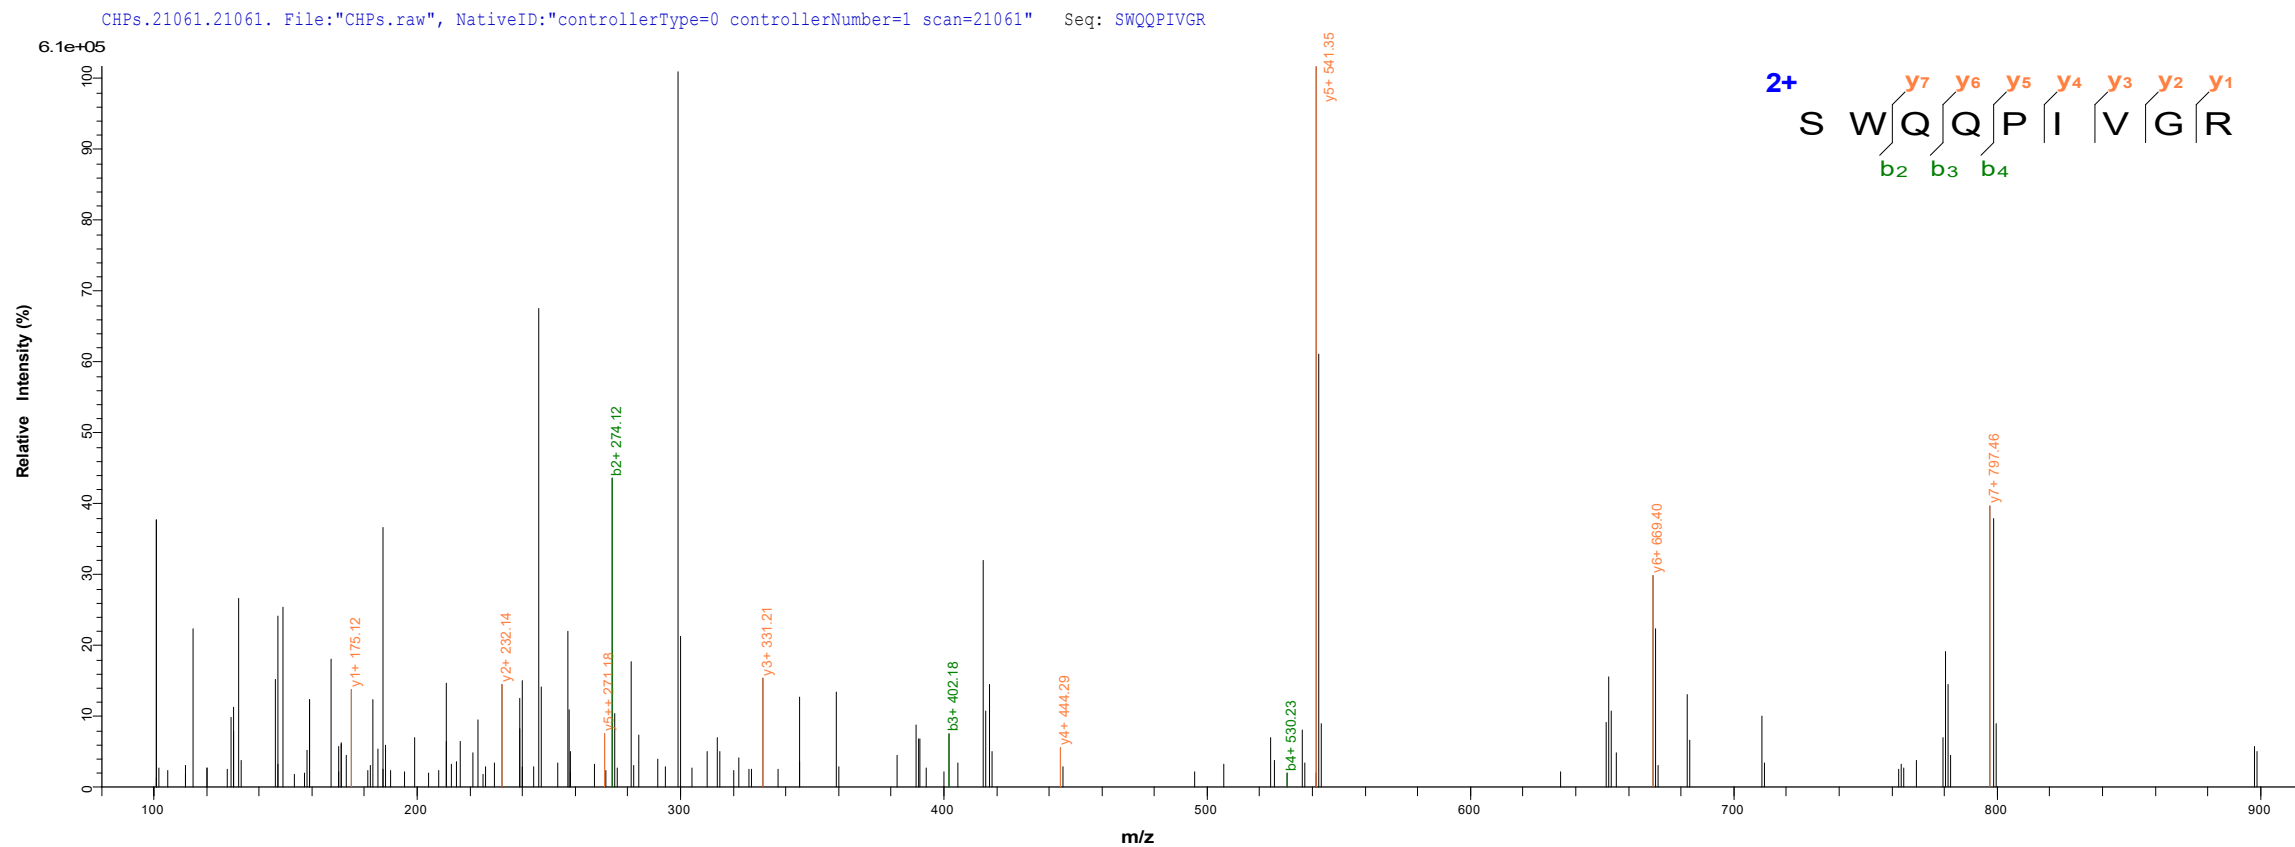

# SWQQPIVGR

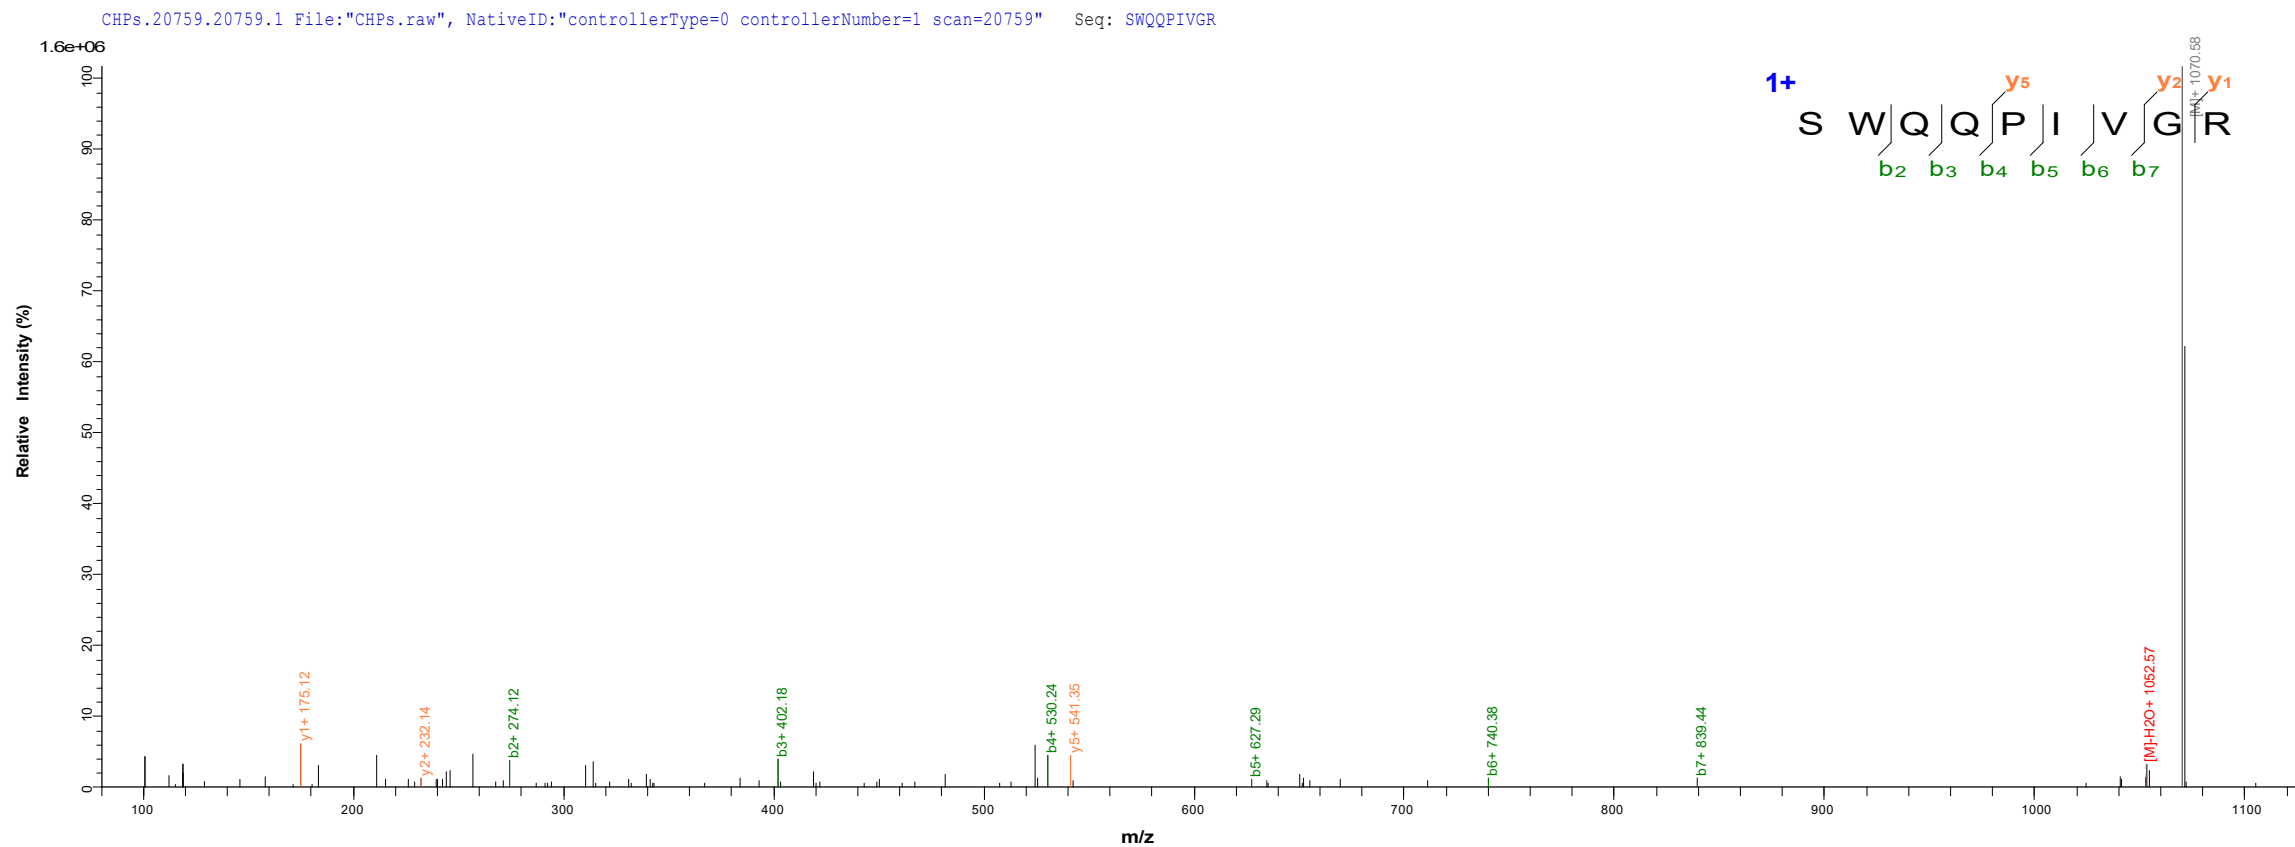

# SWQQPIVGR

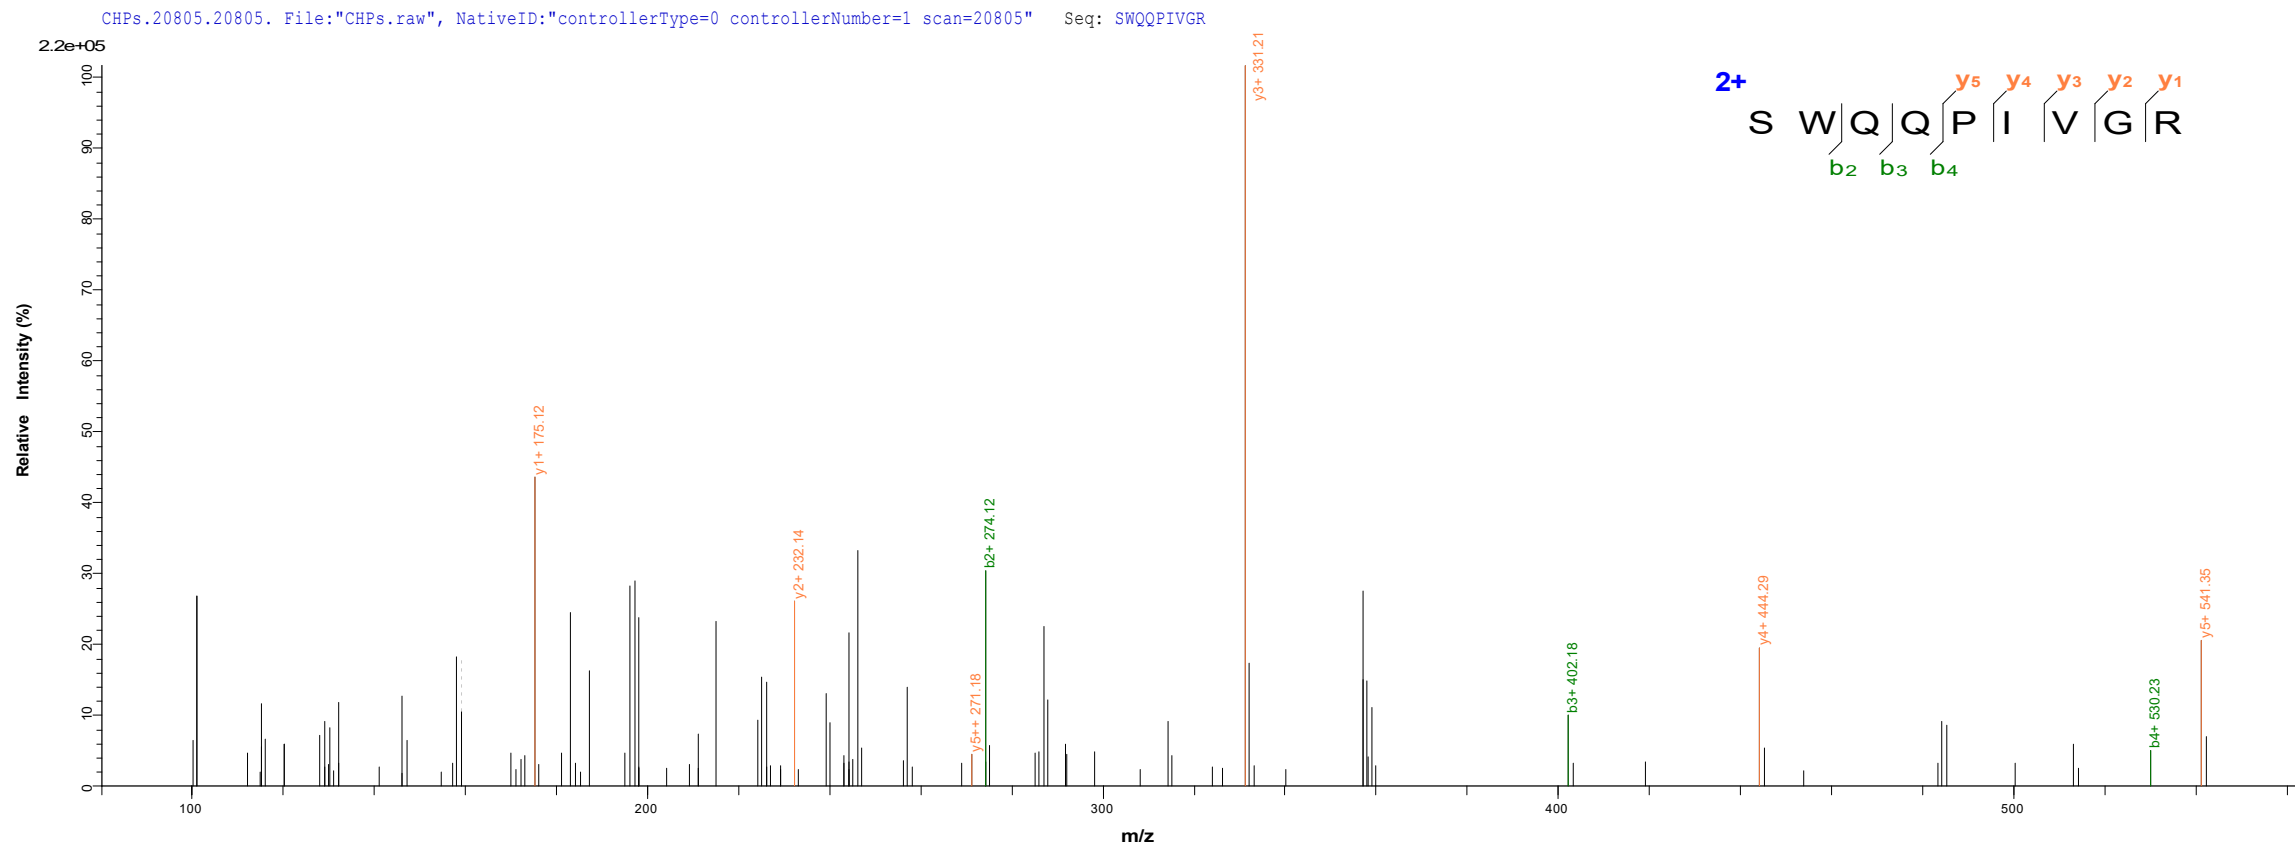

# SWQQPIVGR

CHPs.21261.21261. File:"CHPs.raw", NativeID:"controllerType=0 controllerNumber=1 scan=21261" Seq: SWQQPIVGR

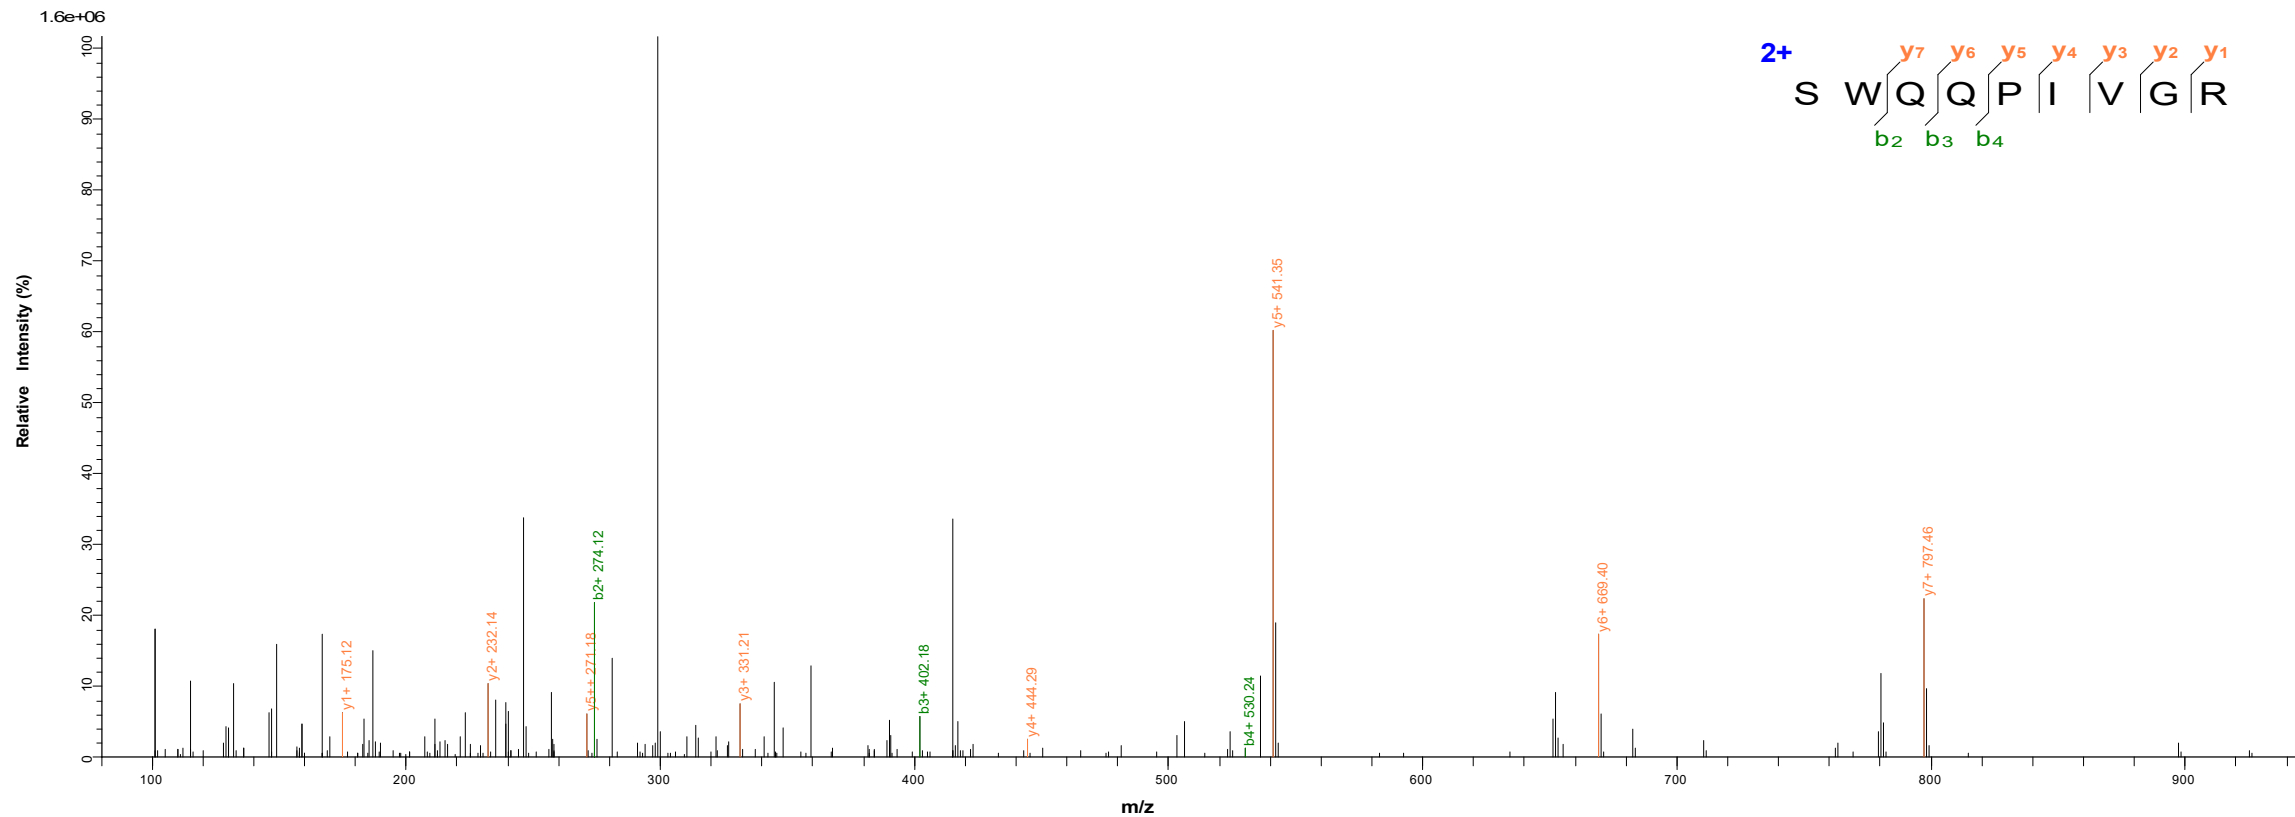

Supplement: s1 [file s1]
