# Supplementary material for: Screening and Activity Analysis of α-Glucosidase Inhibitory Peptides Derived from Coix Seed Prolamins Using Bioinformatics and Molecular Docking
Source: MDPI journal article supplement (doi:10.3390/foods12213970), 2023-10-30
Supplement: s1 [file s1]

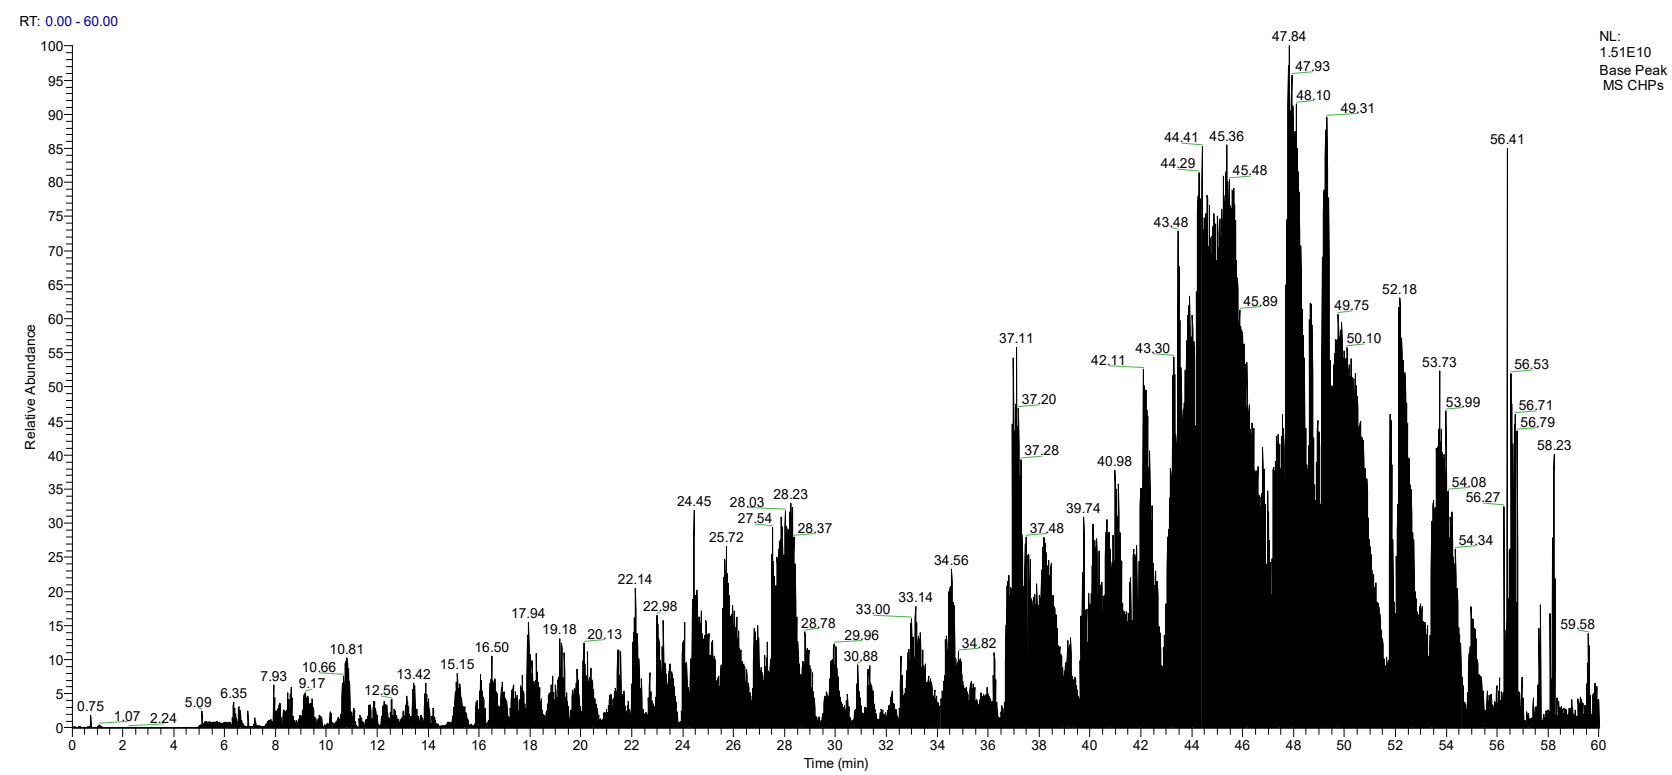

Figure S1. Basepeak diagram of CHPs mass spectrum

Table S1. Peptides identified from CHPs and their bioinformatics analysis

| No. | Sequence       | Length | Molecular weight/Da | Peptide Ranker | Iso-electric point (pI) | Net Charge at pH7.0 | Hydrophobicity /(kcal·mol <sup>-1</sup> ) | Toxicy | Allergenicity | Protein          | Affinity(kcal/mol) |
|-----|----------------|--------|---------------------|----------------|-------------------------|---------------------|-------------------------------------------|--------|---------------|------------------|--------------------|
| 1   | FLSPF          | 5      | 609.31625           | 0.964433       | 5.41                    | 0                   | 3.83                                      | -      | +             | $\alpha$ -coixin | -8.5               |
| 2   | FPCNPL         | 6      | 746.34215           | 0.953249       | 5.2                     | 0                   | 6.05                                      | -      | +             | $\alpha$ -coixin | -7.6               |
| 3   | QQFPFN         | 6      | 779.36024           | 0.906747       | 5.33                    | 0                   | 7.01                                      | -      | +             | $\alpha$ -coixin | -7.9               |
| 4   | CSQRPLLPPFLP   | 12     | 1423.7646           | 0.904167       | 9.5                     | 1                   | 6.02                                      | -      | +             | $\alpha$ -coixin | -8                 |
| 5   | FPSNPL         | 6      | 673.34353           | 0.898827       | 5.52                    | 0                   | 6.53                                      | -      | -             | $\alpha$ -coixin | -7.2               |
| 6   | GCQPPHLPPPPV   | 12     | 1294.6492           | 0.89616        | 7.17                    | 0                   | 11.26                                     | -      | -             | $\gamma$ -coixin | -8.3               |
| 7   | LFPCNPL        | 7      | 859.42621           | 0.887747       | 5.21                    | 0                   | 4.8                                       | -      | -             | $\beta$ -coixin  | -7.1               |
| 8   | AAIIPRFL       | 8      | 899.55927           | 0.886889       | 11.18                   | 1                   | 5.65                                      | -      | -             | $\beta$ -coixin  | -7.5               |
| 9   | QQQQLFPF       | 8      | 1034.5185           | 0.875036       | 5.38                    | 0                   | 6.45                                      | -      | +             | $\alpha$ -coixin | -7.6               |
| 10  | QSQLFPC        | 7      | 878.39564           | 0.873712       | 4.93                    | 0                   | 7.06                                      | -      | -             | $\alpha$ -coixin | -7.9               |
| 11  | SQLFPCNPL      | 9      | 1074.5168           | 0.86338        | 5.2                     | 0                   | 6.03                                      | -      | +             | $\alpha$ -coixin | -7.6               |
| 12  | QQQQFLPF       | 8      | 1034.5185           | 0.861822       | 5.38                    | 0                   | 6.45                                      | -      | +             | $\alpha$ -coixin | -7.6               |
| 13  | FPCNPLV        | 7      | 845.41056           | 0.852117       | 5.24                    | 0                   | 5.59                                      | -      | -             | $\alpha$ -coixin | -8.8               |
| 14  | LPPFLPS        | 7      | 769.43743           | 0.850373       | 5.45                    | 0                   | 4.57                                      | -      | -             | $\alpha$ -coixin | -8.4               |
| 15  | QQQFPFN        | 7      | 907.41882           | 0.847167       | 5.33                    | 0                   | 7.78                                      | -      | +             | $\alpha$ -coixin | -8.2               |
| 16  | QFLPAL         | 6      | 687.39556           | 0.842742       | 5.48                    | 0                   | 5.1                                       | -      | -             | $\alpha$ -coixin | -7.8               |
| 17  | QQLLPF         | 6      | 744.41703           | 0.829531       | 5.38                    | 0                   | 5.37                                      | -      | +             | $\alpha$ -coixin | -7.5               |
| 18  | CSLAPTAIIIPRFL | 14     | 1528.8436           | 0.826699       | 9.5                     | 1                   | 5.73                                      | -      | -             | $\alpha$ -coixin | -6.3               |
| 19  | LLPFYPN        | 7      | 862.45889           | 0.81539        | 5.39                    | 0                   | 4.11                                      | -      | +             | $\alpha$ -coixin | -8.7               |
| 20  | QQQLLPF        | 8      | 985.55967           | 0.81471        | 5.38                    | 0                   | 4.89                                      | -      | +             | $\alpha$ -coixin | -7.7               |
| 21  | QRLLPPFLPS     | 11     | 1263.7339           | 0.805662       | 10.8                    | 1                   | 6.04                                      | -      | -             | $\alpha$ -coixin | -7.7               |

|    |                 |    |           |          |       |   |       |   |   |                  |      |
|----|-----------------|----|-----------|----------|-------|---|-------|---|---|------------------|------|
| 22 | CSQRLLPPFLPSVT  | 15 | 1710.9127 | 0.803383 | 9.5   | 1 | 6.27  | - | - | $\alpha$ -coixin | -7.5 |
| 23 | LFPSNPL         | 7  | 786.42759 | 0.801491 | 5.58  | 0 | 5.28  | - | - | $\alpha$ -coixin | -8   |
| 24 | SQQQQFLPF       | 9  | 1121.5506 | 0.792348 | 5.39  | 0 | 6.91  | - | + | $\alpha$ -coixin | -8.2 |
| 25 | QRQLLPF         | 7  | 900.51814 | 0.78954  | 10.8  | 1 | 7.18  | - | + | $\alpha$ -coixin | -7.9 |
| 26 | CSQRLLPPFLPS    | 13 | 1510.7966 | 0.776267 | 9.5   | 1 | 6.48  | - | + | $\alpha$ -coixin | -7.4 |
| 27 | SWQQPIVGRVF     | 11 | 1315.7037 | 0.77438  | 10.85 | 1 | 7.16  | - | - | $\alpha$ -coixin | -6.9 |
| 28 | SQQFLPAL        | 8  | 902.48617 | 0.770132 | 5.5   | 0 | 6.33  | - | + | $\alpha$ -coixin | -7.4 |
| 29 | SWQQPIVGGVGF    | 12 | 1273.6455 | 0.768389 | 5.39  | 0 | 7.65  | - | - | $\alpha$ -coixin | -7.4 |
| 30 | WQQPIVGGVGF     | 11 | 1186.6135 | 0.767878 | 5.42  | 0 | 7.19  | - | - | $\alpha$ -coixin | -8.1 |
| 31 | CQQPIVGAALF     | 11 | 1202.6118 | 0.762157 | 5.13  | 0 | 7.17  | - | + | $\alpha$ -coixin | -7.8 |
| 32 | QPHPCPYQPQHPSPF | 15 | 1815.8151 | 0.753274 | 7.3   | 0 | 13.73 | - | + | $\gamma$ -coixin | -8   |
| 33 | QLLPFYPN        | 8  | 990.51747 | 0.752167 | 5.32  | 0 | 4.88  | - | + | $\alpha$ -coixin | -8.3 |
| 34 | QQFLPAL         | 7  | 815.45414 | 0.749964 | 5.48  | 0 | 5.87  | - | - | $\alpha$ -coixin | -7.5 |
| 35 | SQRLLPPFLPS     | 12 | 1350.766  | 0.748206 | 10.85 | 1 | 6.5   | - | - | $\alpha$ -coixin | -7.4 |
| 36 | FPCNPLVA        | 8  | 916.44767 | 0.745656 | 5.21  | 0 | 6.09  | - | - | $\alpha$ -coixin | -8.4 |
| 37 | LSWQQPIVGGVGF   | 13 | 1386.7296 | 0.743765 | 5.46  | 0 | 6.4   | - | + | $\alpha$ -coixin | -7.9 |
| 38 | RPLLPPFLPS      | 10 | 1135.6754 | 0.740627 | 10.73 | 1 | 5.27  | - | - | $\alpha$ -coixin | -8.1 |
| 39 | LLPFYPQ         | 7  | 876.47454 | 0.736715 | 5.42  | 0 | 4.03  | - | - | $\alpha$ -coixin | -7.4 |
| 40 | IIPRFLPH        | 8  | 991.59672 | 0.730784 | 11.12 | 1 | 7.12  | - | + | $\alpha$ -coixin | -8.1 |
| 41 | QQRQLLPF        | 8  | 1028.5767 | 0.730333 | 10.8  | 1 | 7.95  | - | + | $\alpha$ -coixin | -7.2 |
| 42 | QQQQFLPAL       | 9  | 1071.5713 | 0.718178 | 5.48  | 0 | 7.41  | - | + | $\alpha$ -coixin | -7.6 |
| 43 | QLFPSNPL        | 8  | 914.48617 | 0.714022 | 5.48  | 0 | 6.05  | - | - | $\alpha$ -coixin | -8.3 |
| 44 | QQLLPFYPN       | 9  | 1118.576  | 0.712016 | 5.32  | 0 | 5.65  | - | + | $\alpha$ -coixin | -7   |
| 45 | QQQLLPFYPN      | 10 | 1246.6346 | 0.711837 | 5.32  | 0 | 6.42  | - | - | $\alpha$ -coixin | -7.3 |
| 46 | QRQLLPFN        | 8  | 1014.5611 | 0.711825 | 10.8  | 1 | 8.03  | - | + | $\alpha$ -coixin | -7.5 |
| 47 | RFLPPV          | 6  | 727.4381  | 0.711307 | 10.73 | 1 | 6.57  | - | + | $\alpha$ -coixin | -8.1 |
| 48 | SQLFPCNPLVA     | 11 | 1244.6223 | 0.710979 | 5.21  | 0 | 6.07  | - | - | $\alpha$ -coixin | -7.6 |
| 49 | QQQFLPSL        | 8  | 959.50763 | 0.70839  | 5.48  | 0 | 6.6   | - | + | $\alpha$ -coixin | -7.3 |
| 50 | LSWQQPIVGRVF    | 12 | 1428.7878 | 0.707602 | 11.11 | 1 | 5.91  | - | - | $\alpha$ -coixin | -7.5 |

|    |                   |    |           |          |       |   |       |   |   |                  |      |
|----|-------------------|----|-----------|----------|-------|---|-------|---|---|------------------|------|
| 51 | SWQQPIVGR         | 9  | 1069.5669 | 0.703379 | 10.85 | 1 | 9.33  | - | - | $\alpha$ -coixin | -8.4 |
| 52 | QQQQLLPFYPN       | 11 | 1374.6932 | 0.699724 | 5.32  | 0 | 7.19  | - | + | $\alpha$ -coixin | -7.6 |
| 53 | SQLFPSNPL         | 9  | 1001.5182 | 0.696191 | 5.5   | 0 | 6.51  | - | + | $\alpha$ -coixin | -7.1 |
| 54 | ATPVFLL           | 7  | 759.45308 | 0.692888 | 5.59  | 0 | 4.12  | - | + | $\gamma$ -coixin | -8   |
| 55 | QSQLFPSNPL        | 10 | 1129.5768 | 0.692315 | 5.48  | 0 | 7.28  | - | + | $\alpha$ -coixin | -7.2 |
| 56 | FSSNPLA           | 7  | 734.3599  | 0.691488 | 5.53  | 0 | 7.35  | - | + | $\alpha$ -coixin | -7.7 |
| 57 | AVARLFL           | 7  | 788.49086 | 0.685505 | 11.18 | 1 | 6.04  | - | - | $\alpha$ -coixin | -7.5 |
| 58 | SQLFPCNPLVAA      | 12 | 1315.6595 | 0.683097 | 5.21  | 0 | 6.57  | - | + | $\alpha$ -coixin | -7   |
| 59 | RFLPPVSAIGF       | 11 | 1202.6812 | 0.678841 | 10.73 | 1 | 5.85  | - | - | $\alpha$ -coixin | -8.3 |
| 60 | AQLFPSNPL         | 9  | 985.52328 | 0.677206 | 5.59  | 0 | 6.55  | - | + | $\alpha$ -coixin | -7.7 |
| 61 | VIIPQCSLAPTAAIIPR | 17 | 1819.039  | 0.674531 | 9.02  | 1 | 6.9   | - | - | $\alpha$ -coixin | -6.9 |
| 62 | QQQQFLPSL         | 9  | 1087.5662 | 0.674033 | 5.48  | 0 | 7.37  | - | + | $\alpha$ -coixin | -6.7 |
| 63 | LQQFLPAL          | 8  | 928.5382  | 0.67313  | 5.58  | 0 | 4.62  | - | + | $\alpha$ -coixin | -7.5 |
| 64 | QLFPCNPLVA        | 10 | 1157.5903 | 0.671625 | 5.2   | 0 | 5.61  | - | + | $\alpha$ -coixin | -7.6 |
| 65 | RNPAASCQQPIVGAALF | 17 | 1798.9148 | 0.669429 | 8.65  | 1 | 11.43 | - | - | $\alpha$ -coixin | -7.3 |
| 66 | WQQPIVGR          | 8  | 982.53485 | 0.66463  | 10.95 | 1 | 8.87  | - | - | $\alpha$ -coixin | -8.1 |
| 67 | QLPINPL           | 7  | 793.46979 | 0.663923 | 5.48  | 0 | 6.18  | - | - | $\alpha$ -coixin | -7.4 |
| 68 | WQQPIVGG          | 8  | 883.4552  | 0.66356  | 5.55  | 0 | 8.21  | - | - | $\alpha$ -coixin | -8.3 |
| 69 | QLLPFYYPQ         | 8  | 1004.5331 | 0.66325  | 5.34  | 0 | 4.8   | - | + | $\alpha$ -coixin | -8   |
| 70 | QQRQLLPFN         | 9  | 1142.6196 | 0.662547 | 10.8  | 1 | 8.8   | - | + | $\alpha$ -coixin | -    |
| 71 | LFPCNPLVA         | 9  | 1029.5317 | 0.662424 | 5.22  | 0 | 4.84  | - | + | $\alpha$ -coixin | -8.1 |
| 72 | LSWQQPIVGG        | 10 | 1083.5713 | 0.657849 | 5.6   | 0 | 7.42  | - | + | $\alpha$ -coixin | -8.3 |
| 73 | AAIIPRFLAPV       | 11 | 1166.7176 | 0.654929 | 11.18 | 1 | 5.83  | - | + | $\beta$ -coixin  | -8.3 |
| 74 | SQQFLPA           | 7  | 789.4021  | 0.65168  | 5.51  | 0 | 7.58  | - | + | $\alpha$ -coixin | -7.5 |
| 75 | TQQLLPF           | 7  | 845.4647  | 0.651234 | 5.37  | 0 | 5.62  | - | + | $\alpha$ -coixin | -7.5 |
| 76 | GVRQPMTSPCPC      | 12 | 1388.5999 | 0.651033 | 8.28  | 1 | 11.59 | - | - | $\gamma$ -coixin | -7.5 |
| 77 | LFPSNPLA          | 8  | 857.4647  | 0.648003 | 5.6   | 0 | 5.78  | - | + | $\alpha$ -coixin | -8.9 |
| 78 | PALSWQQPIVGGVGF   | 15 | 1554.8195 | 0.644328 | 5.5   | 0 | 7.04  | - | - | $\alpha$ -coixin | -7.4 |
| 79 | QQLLPFYYPQ        | 9  | 1132.5917 | 0.642308 | 5.34  | 0 | 5.57  | - | + | $\alpha$ -coixin | -7.5 |

|     |                     |    |           |          |       |    |       |   |   |                  |      |
|-----|---------------------|----|-----------|----------|-------|----|-------|---|---|------------------|------|
| 80  | ALATPVFL            | 8  | 830.49019 | 0.642242 | 5.59  | 0  | 4.62  | - | - | $\gamma$ -coixin | -7.7 |
| 81  | YGAGDLM             | 7  | 725.30543 | 0.639497 | 3.02  | -1 | 11.71 | - | + | $\beta$ -coixin  | -7.5 |
| 82  | HLPFNPQ             | 7  | 851.42899 | 0.639342 | 7.69  | 0  | 9.17  | - | + | $\alpha$ -coixin | -8.7 |
| 83  | SLMNPALSW           | 9  | 1017.4954 | 0.635663 | 5.6   | 0  | 5.05  | - | + | $\alpha$ -coixin | -7.3 |
| 84  | LSWQQPIVGR          | 10 | 1182.6509 | 0.630091 | 11.11 | 1  | 8.08  | - | - | $\alpha$ -coixin | -7.7 |
| 85  | FPSNPLA             | 7  | 744.38064 | 0.630091 | 5.53  | 0  | 7.03  | - | - | $\alpha$ -coixin | -7.1 |
| 86  | WQQPIVG             | 7  | 826.43374 | 0.629698 | 5.55  | 0  | 7.06  | - | - | $\alpha$ -coixin | -7.7 |
| 87  | AIIPQCSLAPSAAIPQ    | 17 | 1748.9495 | 0.629658 | 5.11  | 0  | 7.03  | - | - | $\alpha$ -coixin | -6.7 |
| 88  | SWQQPIVGGV          | 10 | 1069.5556 | 0.628159 | 5.54  | 0  | 8.21  | - | - | $\alpha$ -coixin | -7.7 |
| 89  | QQLLAFNPL           | 9  | 1042.5811 | 0.627684 | 5.48  | 0  | 5.47  | - | + | $\alpha$ -coixin | -7.1 |
| 90  | CSLAPTAAIPR         | 12 | 1268.6911 | 0.626589 | 9.5   | 1  | 8.69  | - | + | $\alpha$ -coixin | -6.2 |
| 91  | SCQQPIVGR           | 9  | 1043.5182 | 0.62638  | 8.76  | 1  | 11.4  | - | - | $\alpha$ -coixin | -6.9 |
| 92  | QQLQQFLPAL          | 10 | 1184.6554 | 0.623992 | 5.48  | 0  | 6.16  | - | + | $\alpha$ -coixin | -7.5 |
| 93  | PCNPLVANAAAYL       | 13 | 1372.6809 | 0.622054 | 5.21  | 0  | 8.19  | - | - | $\alpha$ -coixin | -7.8 |
| 94  | QQQLLPFYYPQ         | 10 | 1260.6503 | 0.618021 | 5.34  | 0  | 6.34  | - | - | $\alpha$ -coixin | -7.6 |
| 95  | SLMNPAL             | 7  | 744.38401 | 0.616927 | 5.5   | 0  | 6.68  | - | - | $\alpha$ -coixin | -7.4 |
| 96  | QQQRQLLPF           | 9  | 1156.6353 | 0.614182 | 10.8  | 1  | 8.72  | - | + | $\alpha$ -coixin | -7.1 |
| 97  | QQRQLLPFNQM         | 11 | 1401.7187 | 0.61275  | 10.8  | 1  | 8.9   | - | - | $\alpha$ -coixin | -4   |
| 98  | ALRNPAASCQQPIVGAALF | 19 | 1983.036  | 0.609432 | 9.09  | 1  | 10.68 | - | + | $\alpha$ -coixin | -7   |
| 99  | IIPRFLAPV           | 9  | 1024.6433 | 0.60577  | 11.12 | 1  | 4.83  | - | + | $\beta$ -coixin  | -7.7 |
| 100 | QQLPINPL            | 8  | 921.52837 | 0.603928 | 5.48  | 0  | 6.95  | - | + | $\alpha$ -coixin | -7.8 |
| 101 | AAIIPRFLAPVSAI      | 14 | 1437.8708 | 0.601295 | 11.18 | 1  | 5.6   | - | - | $\beta$ -coixin  | -7.4 |
| 102 | IPRFLPPVSAI         | 11 | 1208.7281 | 0.60059  | 11.12 | 1  | 5.43  | - | + | $\alpha$ -coixin | -8.3 |
| 103 | LFPSNPLVA           | 9  | 956.53312 | 0.600145 | 5.6   | 0  | 5.32  | - | - | $\alpha$ -coixin | -7.8 |
| 104 | QLLPAL              | 6  | 653.41121 | 0.599194 | 5.48  | 0  | 5.56  | - | - | $\alpha$ -coixin | -7.8 |
| 105 | LFPCNPLVAA          | 10 | 1100.5689 | 0.598454 | 5.22  | 0  | 5.34  | - | + | $\alpha$ -coixin | -7.4 |
| 106 | CSCSPVAVPY          | 10 | 1138.4787 | 0.589377 | 5.02  | 0  | 7.93  | - | + | $\beta$ -coixin  | -8.3 |
| 107 | LSWQQPIVGGV         | 11 | 1182.6397 | 0.588817 | 5.63  | 0  | 6.96  | - | + | $\alpha$ -coixin | -8.3 |
| 108 | QQQQLLPFYYPQ        | 11 | 1388.7089 | 0.588341 | 5.34  | 0  | 7.11  | - | + | $\alpha$ -coixin | -6.8 |

|     |                       |    |           |          |       |   |       |   |   |                  |      |
|-----|-----------------------|----|-----------|----------|-------|---|-------|---|---|------------------|------|
| 109 | GQCIEFLRHQCSAATPY     | 18 | 2133.9724 | 0.587626 | 7.01  | 0 | 15.52 | - | + | $\gamma$ -coixin | -6.9 |
| 110 | QQQQFLPSLSQL          | 12 | 1415.7409 | 0.586533 | 5.48  | 0 | 7.35  | - | - | $\alpha$ -coixin | -7   |
| 111 | QLFPSNPLA             | 9  | 985.52328 | 0.585702 | 5.49  | 0 | 6.55  | - | + | $\alpha$ -coixin | -8.4 |
| 112 | FQQQQQRQLLPF          | 12 | 1559.8209 | 0.584691 | 10.9  | 1 | 8.55  | - | - | $\beta$ -coixin  | -6.7 |
| 113 | IIPQCSQRPLLPPFLPS     | 17 | 1962.0761 | 0.584329 | 9.03  | 1 | 5.15  | - | - | $\alpha$ -coixin | -7.1 |
| 114 | FLQQQQRQLLPF          | 12 | 1544.8463 | 0.581958 | 10.9  | 1 | 6.53  | - | + | $\alpha$ -coixin | -6.7 |
| 115 | MNPALSWQQPIVGGVGF     | 17 | 1799.9029 | 0.581382 | 5.4   | 0 | 7.22  | - | + | $\alpha$ -coixin | -7.7 |
| 116 | LSWQQPIVG             | 9  | 1026.5498 | 0.580399 | 5.6   | 0 | 6.27  | - | - | $\alpha$ -coixin | -7.8 |
| 117 | IIPRFLPPVSAI          | 12 | 1321.8122 | 0.579475 | 11.12 | 1 | 4.31  | - | - | $\alpha$ -coixin | -7.5 |
| 118 | QHLPFNPQ              | 8  | 979.48756 | 0.57884  | 7.59  | 0 | 9.94  | - | + | $\alpha$ -coixin | -8   |
| 119 | SQLFPSNPLVA           | 11 | 1171.6237 | 0.577573 | 5.51  | 0 | 6.55  | - | + | $\alpha$ -coixin | -7.5 |
| 120 | QQPIVGGVGF            | 10 | 1000.5342 | 0.576374 | 5.38  | 0 | 9.28  | - | - | $\alpha$ -coixin | -8.2 |
| 121 | SQLFPSNPLA            | 10 | 1072.5553 | 0.576225 | 5.51  | 0 | 7.01  | - | + | $\alpha$ -coixin | #N/A |
| 122 | QQHLPFNPQ             | 9  | 1107.5461 | 0.574762 | 7.59  | 0 | 10.71 | - | + | $\alpha$ -coixin | -8.4 |
| 123 | QQPIGQPL              | 8  | 879.48142 | 0.573868 | 5.48  | 0 | 9.27  | - | - | $\gamma$ -coixin | -7.5 |
| 124 | QLPLVNF               | 7  | 829.46979 | 0.566444 | 5.38  | 0 | 4.99  | - | - | $\alpha$ -coixin | -7.7 |
| 125 | QQQFLPSLSQL           | 11 | 1287.6823 | 0.565906 | 5.48  | 0 | 6.58  | - | - | $\alpha$ -coixin | -7.4 |
| 126 | QQQRQLLPFNQM          | 12 | 1529.7773 | 0.565365 | 10.8  | 1 | 9.67  | - | - | $\alpha$ -coixin | -6.9 |
| 127 | CQQPIVGR              | 8  | 956.48618 | 0.564657 | 9.5   | 1 | 10.94 | - | + | $\alpha$ -coixin | -6.5 |
| 128 | LRNPAASCQQPIVGAAALF   | 18 | 1911.9989 | 0.561186 | 9.02  | 1 | 10.18 | - | - | $\alpha$ -coixin | -6.6 |
| 129 | SQLFPSNPLVT           | 11 | 1201.6343 | 0.560072 | 5.3   | 0 | 6.3   | - | + | $\alpha$ -coixin | -7.3 |
| 130 | SQLFPSNPLVAA          | 12 | 1242.6608 | 0.556342 | 5.51  | 0 | 7.05  | - | + | $\alpha$ -coixin | -7.2 |
| 131 | IIPRFLAPVSAI          | 12 | 1295.7965 | 0.554588 | 11.12 | 1 | 4.67  | - | - | $\beta$ -coixin  | -7.6 |
| 132 | QQQLPINPL             | 9  | 1049.5869 | 0.554307 | 5.48  | 0 | 7.72  | - | - | $\alpha$ -coixin | -7.4 |
| 133 | LALRNPAASCQQPIVGAAALF | 20 | 2096.1201 | 0.553395 | 9.02  | 1 | 9.43  | - | - | $\alpha$ -coixin | -6.7 |
| 134 | LQQAIIIGGAIF          | 11 | 1129.6495 | 0.55082  | 5.46  | 0 | 6.42  | - | + | $\alpha$ -coixin | -7.5 |
| 135 | AAIIPR                | 6  | 639.4068  | 0.549079 | 11.18 | 1 | 8.61  | - | + | $\alpha$ -coixin | -7.1 |
| 136 | QLFPSNPLVAA           | 11 | 1155.6288 | 0.549028 | 5.49  | 0 | 6.59  | - | + | $\alpha$ -coixin | -8.2 |
| 137 | QQQQLPINPL            | 10 | 1177.6455 | 0.548434 | 5.48  | 0 | 8.49  | - | + | $\alpha$ -coixin | -7   |

|     |                      |    |           |          |       |   |       |   |   |                  |      |
|-----|----------------------|----|-----------|----------|-------|---|-------|---|---|------------------|------|
| 138 | QLQQLLPAL            | 9  | 1022.6124 | 0.545404 | 5.48  | 0 | 5.85  | - | + | $\alpha$ -coixin | -6.3 |
| 139 | IIPRFLAPVS           | 10 | 1111.6754 | 0.54386  | 11.12 | 1 | 5.29  | - | - | $\beta$ -coixin  | -8.1 |
| 140 | AQLLPFNQQLAVASPIASLQ | 20 | 2108.163  | 0.542326 | 5.44  | 0 | 6.74  | - | + | $\alpha$ -coixin | -7   |
| 141 | QLQQFLPA             | 8  | 943.51272 | 0.538263 | 5.49  | 0 | 6.64  | - | + | $\alpha$ -coixin | -7.3 |
| 142 | AIIPRFLPPVSAI        | 13 | 1392.8493 | 0.537285 | 11.18 | 1 | 4.81  | - | + | $\alpha$ -coixin | -8   |
| 143 | LFPSNPLVVT           | 10 | 1085.6121 | 0.535907 | 5.36  | 0 | 4.61  | - | + | $\alpha$ -coixin | -7   |
| 144 | QQQQRQLLPFNQM        | 13 | 1657.8359 | 0.534815 | 10.8  | 1 | 10.44 | - | - | $\alpha$ -coixin | -6.7 |
| 145 | LSCQQPIVGR           | 10 | 1156.6023 | 0.534064 | 9.02  | 1 | 10.15 | - | - | $\alpha$ -coixin | -6.9 |
| 146 | AAIIPRFLPPVSAI       | 14 | 1463.8864 | 0.530864 | 11.18 | 1 | 5.31  | - | - | $\alpha$ -coixin | -6.9 |
| 147 | AFLQQQQRQLLPF        | 13 | 1615.8835 | 0.53028  | 11.18 | 1 | 7.03  | - | - | $\alpha$ -coixin | -7.1 |
| 148 | QLFSSNPL             | 8  | 904.46543 | 0.529918 | 5.48  | 0 | 6.37  | - | + | $\alpha$ -coixin | -8   |
| 149 | QQQQRQLLPF           | 10 | 1284.6939 | 0.528584 | 10.8  | 1 | 9.49  | - | - | $\alpha$ -coixin | -6.6 |
| 150 | QQLQQLLPAL           | 10 | 1150.671  | 0.527076 | 5.48  | 0 | 6.62  | - | + | $\alpha$ -coixin | -6.8 |
| 151 | QQAIIGGAIF           | 10 | 1016.5655 | 0.526419 | 5.38  | 0 | 7.67  | - | + | $\alpha$ -coixin | -7.2 |
| 152 | IPRFLPPVSAV          | 11 | 1194.7125 | 0.519018 | 11.12 | 1 | 6.09  | - | + | $\alpha$ -coixin | -7.9 |
| 153 | FPSNPLVTA            | 9  | 944.49673 | 0.512651 | 5.53  | 0 | 6.82  | - | + | $\alpha$ -coixin | -7.2 |
| 154 | RQPQCSCSPVAVPY       | 14 | 1647.7497 | 0.508958 | 8.18  | 1 | 11.42 | - | - | $\beta$ -coixin  | -6.9 |
| 155 | QQQHLPFNPQ           | 10 | 1235.6047 | 0.508282 | 7.59  | 0 | 11.48 | - | - | $\alpha$ -coixin | -6.8 |
| 156 | QLQHILPVL            | 9  | 1059.6441 | 0.507467 | 7.59  | 0 | 6.58  | - | + | $\alpha$ -coixin | -7.2 |
| 157 | QQQQRQLLPFNQM        | 14 | 1785.8944 | 0.507135 | 10.8  | 1 | 11.21 | - | + | $\beta$ -coixin  | -7   |
| 158 | IIPRFLAPVSAIGFEHPAVQ | 20 | 2161.2048 | 0.505111 | 7.9   | 0 | 11.02 | - | - | $\beta$ -coixin  | -7.2 |
| 159 | SQLFPSNPLVTA         | 12 | 1272.6714 | 0.50392  | 5.51  | 0 | 6.8   | - | + | $\alpha$ -coixin | -7   |
| 160 | SLMNPALSWQQPIVG      | 15 | 1639.8392 | 0.503075 | 5.51  | 0 | 6.3   | - | - | $\alpha$ -coixin | -7.4 |
| 161 | IIPRFLPPVSA          | 11 | 1208.7281 | 0.502783 | 11.12 | 1 | 5.43  | - | + | $\alpha$ -coixin | -7.9 |
| 162 | SQLFPSNPLVVTN        | 13 | 1414.7456 | 0.500599 | 5.34  | 0 | 6.69  | - | + | $\alpha$ -coixin | -8   |
| 163 | SLMNPALSWQQPIVGGV    | 17 | 1795.9291 | 0.499683 | 5.54  | 0 | 6.99  | - | - | $\alpha$ -coixin | -    |
| 164 | SLMNPALSCQQPIVGR     | 16 | 1769.8917 | 0.498589 | 8.76  | 1 | 10.18 | - | - | $\alpha$ -coixin | -    |
| 165 | IIPRFLPPVSAV         | 12 | 1307.7965 | 0.498178 | 11.12 | 1 | 4.97  | - | - | $\alpha$ -coixin | -    |
| 166 | LFPSNPLVTA           | 10 | 1057.5808 | 0.487906 | 5.6   | 0 | 5.57  | - | + | $\alpha$ -coixin | -    |

|     |                      |    |           |          |       |    |       |   |   |                  |   |
|-----|----------------------|----|-----------|----------|-------|----|-------|---|---|------------------|---|
| 167 | LQQLLPAL             | 8  | 894.55385 | 0.487367 | 5.58  | 0  | 5.08  | - | + | $\alpha$ -coixin | - |
| 168 | YQQLPSYC             | 8  | 1057.4539 | 0.487151 | 4.93  | 0  | 7.35  | - | - | $\beta$ -coixin  | - |
| 169 | QQQQQRQLLPF          | 11 | 1412.7524 | 0.485675 | 10.8  | 1  | 10.26 | - | - | $\beta$ -coixin  | - |
| 170 | QLQQLLPALSQL         | 12 | 1350.7871 | 0.485359 | 5.48  | 0  | 5.83  | - | - | $\alpha$ -coixin | - |
| 171 | ASCQQPIVGA           | 10 | 1029.4913 | 0.484507 | 5.22  | 0  | 10.59 | - | + | $\alpha$ -coixin | - |
| 172 | QFLPALSQL            | 9  | 1015.5702 | 0.483986 | 5.48  | 0  | 5.08  | - | + | $\alpha$ -coixin | - |
| 173 | TIIPQCSQRLLPPFLPS    | 18 | 2063.1238 | 0.483834 | 8.7   | 1  | 5.4   | - | - | $\alpha$ -coixin | - |
| 174 | MNPALSCQQPIVGR       | 14 | 1569.7756 | 0.481713 | 8.79  | 1  | 10.97 | - | - | $\alpha$ -coixin | - |
| 175 | ANPITYPA             | 8  | 845.42832 | 0.478355 | 5.59  | 0  | 8.45  | - | - | $\alpha$ -coixin | - |
| 176 | GFEHPAVR             | 8  | 911.46135 | 0.474336 | 7.91  | 0  | 15.29 | - | + | $\alpha$ -coixin | - |
| 177 | RFLPPVS              | 7  | 814.47012 | 0.471512 | 10.73 | 1  | 7.03  | - | - | $\alpha$ -coixin | - |
| 178 | QQFLPALSQL           | 10 | 1143.6288 | 0.470815 | 5.48  | 0  | 5.85  | - | + | $\alpha$ -coixin | - |
| 179 | LQQQQRQLLPF          | 11 | 1397.7779 | 0.468946 | 11.11 | 1  | 8.24  | - | + | $\alpha$ -coixin | - |
| 180 | FLPPVSAIG            | 9  | 899.51165 | 0.468931 | 5.53  | 0  | 5.75  | - | + | $\alpha$ -coixin | - |
| 181 | YGAGDL               | 6  | 594.26494 | 0.4685   | 3.12  | -1 | 12.38 | - | + | $\beta$ -coixin  | - |
| 182 | QAIIGGAIF            | 9  | 888.5069  | 0.466324 | 5.38  | 0  | 6.9   | - | + | $\alpha$ -coixin | - |
| 183 | AAIIPRFLPPVSAV       | 14 | 1449.8708 | 0.465172 | 11.18 | 1  | 5.97  | - | - | $\alpha$ -coixin | - |
| 184 | LQQQQRQLLPFNQM       | 14 | 1770.9199 | 0.463201 | 11.11 | 1  | 9.19  | - | - | $\alpha$ -coixin | - |
| 185 | QQFLPSLSQL           | 10 | 1159.6237 | 0.463011 | 5.48  | 0  | 5.81  | - | + | $\alpha$ -coixin | - |
| 186 | CSLAPTAAIIPRFLPPVSAV | 20 | 2079.1551 | 0.45864  | 9.5   | 1  | 6.05  | - | - | $\alpha$ -coixin | - |
| 187 | LSCQQPIVG            | 9  | 1000.5012 | 0.453089 | 5.22  | 0  | 8.34  | - | + | $\alpha$ -coixin | - |
| 188 | QHILPVL              | 7  | 818.50142 | 0.451485 | 7.59  | 0  | 7.06  | - | + | $\alpha$ -coixin | - |
| 189 | QPLDQL               | 6  | 712.37555 | 0.448852 | 3.12  | -1 | 10.72 | - | + | $\alpha$ -coixin | - |
| 190 | ALRNPATLL            | 9  | 967.58147 | 0.445854 | 11.18 | 1  | 8.2   | - | + | $\alpha$ -coixin | - |
| 191 | LFPSNPLVTAN          | 11 | 1171.6237 | 0.444793 | 5.41  | 0  | 6.42  | - | + | $\alpha$ -coixin | - |
| 192 | TVATLFPPL            | 8  | 860.50076 | 0.44477  | 5.47  | 0  | 4.37  | - | + | $\gamma$ -coixin | - |
| 193 | QQQLLPFNQVAVA        | 13 | 1454.7882 | 0.444727 | 5.49  | 0  | 7.84  | - | + | $\alpha$ -coixin | - |
| 194 | QQPLIQL              | 7  | 838.49125 | 0.432606 | 5.48  | 0  | 6.73  | - | + | $\alpha$ -coixin | - |
| 195 | LQHILPVL             | 8  | 931.58549 | 0.431239 | 7.89  | 0  | 5.81  | - | + | $\alpha$ -coixin | - |



|     |                      |    |           |          |       |    |       |   |   |                  |   |
|-----|----------------------|----|-----------|----------|-------|----|-------|---|---|------------------|---|
| 196 | QNQELLPTL            | 9  | 1054.5659 | 0.430118 | 3.2   | -1 | 10.56 | - | + | $\alpha$ -coixin | - |
| 197 | ANPITYPAA            | 9  | 916.46543 | 0.421128 | 5.59  | 0  | 8.95  | - | + | $\alpha$ -coixin | - |
| 198 | ILQQPL               | 6  | 710.43268 | 0.410805 | 5.58  | 0  | 5.96  | - | + | $\alpha$ -coixin | - |
| 199 | IIPQFLPTVSAIGFEHPAVQ | 20 | 2163.1728 | 0.407779 | 5.06  | -1 | 9.73  | - | + | $\alpha$ -coixin | - |
| 200 | QILPVL               | 6  | 681.44251 | 0.403083 | 5.48  | 0  | 4.73  | - | + | $\alpha$ -coixin | - |
| 201 | QLQQLLPA             | 8  | 909.52837 | 0.398012 | 5.49  | 0  | 7.1   | - | + | $\alpha$ -coixin | - |
| 202 | IQRFLPPVSAI          | 11 | 1239.7339 | 0.39543  | 11.12 | 1  | 6.06  | - | + | $\alpha$ -coixin | - |
| 203 | CQQPIVGAA            | 9  | 942.4593  | 0.395195 | 5.23  | 0  | 10.13 | - | + | $\alpha$ -coixin | - |
| 204 | CQQPIVGA             | 8  | 871.42219 | 0.395114 | 5.23  | 0  | 9.63  | - | + | $\alpha$ -coixin | - |
| 205 | RFLPPVSAIG           | 10 | 1055.6128 | 0.393757 | 10.73 | 1  | 7.56  | - | - | $\alpha$ -coixin | - |
| 206 | QQPIVGR              | 7  | 796.45554 | 0.386645 | 10.8  | 1  | 10.96 | - | + | $\alpha$ -coixin | - |
| 207 | FLPPVSAI             | 8  | 842.49019 | 0.383119 | 5.51  | 0  | 4.6   | - | - | $\alpha$ -coixin | - |
| 208 | QRFLPPVSAI           | 10 | 1126.6499 | 0.382502 | 7.8   | 1  | 7.18  | - | + | $\alpha$ -coixin | - |
| 209 | QLQQILPVL            | 9  | 1050.6437 | 0.380952 | 5.48  | 0  | 5.02  | - | + | $\alpha$ -coixin | - |
| 210 | SILRSSPLFAQQPL       | 14 | 1555.8722 | 0.378886 | 10.85 | 1  | 6.83  | - | - | $\alpha$ -coixin | - |
| 211 | SLMNPALS             | 8  | 831.41604 | 0.37874  | 5.38  | 0  | 7.14  | - | + | $\alpha$ -coixin | - |
| 212 | FLPPVSA              | 7  | 729.40613 | 0.377701 | 5.53  | 0  | 5.72  | - | - | $\alpha$ -coixin | - |
| 213 | QQVLPALSQLVVANPAAAY  | 18 | 1881.036  | 0.375659 | 5.37  | 0  | 7.96  | - | - | $\alpha$ -coixin | - |
| 214 | QQPLDQL              | 7  | 840.43413 | 0.375134 | 3.12  | -1 | 11.49 | - | - | $\alpha$ -coixin | - |
| 215 | AVASPIASL            | 9  | 827.47527 | 0.374068 | 5.59  | 0  | 7.63  | - | + | $\alpha$ -coixin | - |
| 216 | ALRNPATL             | 8  | 854.4974  | 0.372145 | 11.18 | 1  | 9.45  | - | - | $\alpha$ -coixin | - |
| 217 | TFFPQCSPVTT          | 11 | 1283.5856 | 0.36086  | 5.04  | 0  | 6.26  | - | - | $\alpha$ -coixin | - |
| 218 | SAAIIPQ              | 7  | 698.39629 | 0.35839  | 5.37  | 0  | 8.03  | - | + | $\alpha$ -coixin | - |
| 219 | SILQQPLIQL           | 10 | 1151.6914 | 0.352639 | 5.5   | 0  | 4.82  | - | - | $\alpha$ -coixin | - |
| 220 | ALRNPAASCQQPIVGA     | 16 | 1651.8464 | 0.352506 | 9.09  | 1  | 13.14 | - | + | $\alpha$ -coixin | - |
| 221 | AVANPNSYLQQQQLLPF    | 17 | 1929.9949 | 0.337652 | 5.46  | 0  | 7.79  | - | + | $\alpha$ -coixin | - |
| 222 | VIIPQCSL             | 8  | 928.50519 | 0.337595 | 5.21  | 0  | 5.21  | - | + | $\alpha$ -coixin | - |
| 223 | ALRNPAASCQQPIVGAA    | 17 | 1722.8835 | 0.336699 | 9.09  | 1  | 13.64 | - | - | $\alpha$ -coixin | - |
| 224 | QQPLAQL              | 7  | 796.4443  | 0.335794 | 5.48  | 0  | 8.35  | - | + | $\alpha$ -coixin | - |

|     |                |    |           |          |       |    |       |   |   |                  |   |
|-----|----------------|----|-----------|----------|-------|----|-------|---|---|------------------|---|
| 225 | QELLPTL        | 7  | 812.46437 | 0.334795 | 3.2   | -1 | 8.94  | - | - | $\alpha$ -coixin | - |
| 226 | LQQILPVL       | 8  | 922.58515 | 0.333711 | 5.58  | 0  | 4.25  | - | + | $\alpha$ -coixin | - |
| 227 | QLLASNPL       | 8  | 854.48617 | 0.327784 | 5.48  | 0  | 6.87  | - | + | $\alpha$ -coixin | - |
| 228 | QQLLPALSQL     | 10 | 1109.6445 | 0.326241 | 5.48  | 0  | 6.31  | - | + | $\alpha$ -coixin | - |
| 229 | VIIPQCSLAPTA   | 12 | 1268.6799 | 0.325034 | 5.22  | 0  | 6.69  | - | - | $\alpha$ -coixin | - |
| 230 | RFLPPVSAI      | 9  | 998.5913  | 0.323899 | 10.73 | 1  | 6.41  | - | + | $\alpha$ -coixin | - |
| 231 | VANPITYPA      | 9  | 944.49673 | 0.321849 | 5.58  | 0  | 7.99  | - | - | $\alpha$ -coixin | - |
| 232 | ALRNPA         | 6  | 640.36566 | 0.321391 | 11.18 | 1  | 10.45 | - | + | $\alpha$ -coixin | - |
| 233 | RFLPPVSA       | 8  | 885.50724 | 0.317553 | 10.73 | 1  | 7.53  | - | + | $\alpha$ -coixin | - |
| 234 | VIIPQCSLAPT    | 11 | 1197.6427 | 0.316576 | 5.06  | 0  | 6.19  | - | + | $\alpha$ -coixin | - |
| 235 | QQLPALSQL      | 9  | 981.58588 | 0.313062 | 5.48  | 0  | 5.54  | - | - | $\alpha$ -coixin | - |
| 236 | FLPPVSAV       | 8  | 828.47454 | 0.311655 | 5.56  | 0  | 5.26  | - | - | $\alpha$ -coixin | - |
| 237 | QNQELLPT       | 8  | 941.48181 | 0.309172 | 3.08  | -1 | 11.81 | - | + | $\alpha$ -coixin | - |
| 238 | AVASPIASLQ     | 10 | 955.53385 | 0.307975 | 5.44  | 0  | 8.4   | - | + | $\alpha$ -coixin | - |
| 239 | LTLLCGIHSRSAL  | 13 | 1439.7919 | 0.307606 | 9.03  | 1  | 8.72  | - | - | $\gamma$ -coixin | - |
| 240 | QQPIVGGV       | 8  | 796.4443  | 0.307297 | 5.52  | 0  | 9.84  | - | - | $\alpha$ -coixin | - |
| 241 | LAVASPIASL     | 10 | 940.55933 | 0.307059 | 5.58  | 0  | 6.38  | - | - | $\alpha$ -coixin | - |
| 242 | VATFLQQQRQLLPF | 15 | 1815.9996 | 0.306494 | 11.11 | 1  | 6.82  | - | - | $\alpha$ -coixin | - |
| 243 | QQQLQQLLPA     | 10 | 1165.6455 | 0.305363 | 5.49  | 0  | 8.64  | - | + | $\alpha$ -coixin | - |
| 244 | CSLAPSAA       | 8  | 775.35344 | 0.30528  | 5.23  | 0  | 9.19  | - | + | $\alpha$ -coixin | - |
| 245 | QQLQQQLLPAI    | 11 | 1278.7296 | 0.302054 | 5.47  | 0  | 7.52  | - | - | $\alpha$ -coixin | - |
| 246 | ADRRSGIY       | 9  | 1051.5047 | 0.298126 | 6.88  | 0  | 19.08 | - | - | $\gamma$ -coixin | - |
| 247 | QQLLASNPL      | 9  | 982.54475 | 0.296391 | 5.48  | 0  | 7.64  | - | + | $\alpha$ -coixin | - |
| 248 | SILRSSPL       | 8  | 871.51272 | 0.295675 | 10.85 | 1  | 7.61  | - | - | $\alpha$ -coixin | - |
| 249 | NQILQPY        | 7  | 874.45487 | 0.294731 | 5.27  | 0  | 7.35  | - | + | $\alpha$ -coixin | - |
| 250 | AVANPITYPA     | 10 | 1015.5338 | 0.294582 | 5.59  | 0  | 8.49  | - | + | $\alpha$ -coixin | - |
| 251 | FSSNPVSTA      | 9  | 908.42396 | 0.290164 | 5.53  | 0  | 8.85  | - | + | $\alpha$ -coixin | - |
| 252 | QQILPVLSQL     | 10 | 1137.6758 | 0.288367 | 5.48  | 0  | 5.48  | - | + | $\alpha$ -coixin | - |
| 253 | CENQILQPY      | 9  | 1163.5281 | 0.286816 | 3.14  | -1 | 10.96 | - | + | $\alpha$ -coixin | - |

|     |                        |    |           |          |       |    |       |   |   |                  |   |
|-----|------------------------|----|-----------|----------|-------|----|-------|---|---|------------------|---|
| 254 | SILQQPLAQL             | 10 | 1109.6445 | 0.284515 | 5.5   | 0  | 6.44  | - | - | $\alpha$ -coixin | - |
| 255 | QHILPVLSEL             | 10 | 1147.6601 | 0.283339 | 5.06  | -1 | 9.9   | - | + | $\alpha$ -coixin | - |
| 256 | QQVLPALSQL             | 10 | 1095.6288 | 0.283033 | 5.48  | 0  | 7.1   | - | + | $\alpha$ -coixin | - |
| 257 | QQPLIQLQ               | 8  | 966.54983 | 0.282927 | 5.35  | 0  | 7.5   | - | + | $\alpha$ -coixin | - |
| 258 | RFLPPVSAV              | 9  | 984.57565 | 0.278258 | 10.73 | 1  | 7.07  | - | - | $\alpha$ -coixin | - |
| 259 | SHRLQ                  | 5  | 639.34526 | 0.278044 | 10.85 | 1  | 12.02 | - | + | $\alpha$ -coixin | - |
| 260 | SAVIIPQ                | 7  | 726.42759 | 0.274376 | 5.37  | 0  | 7.07  | - | - | $\alpha$ -coixin | - |
| 261 | QLQQILPVLS             | 10 | 1137.6758 | 0.269586 | 5.37  | 0  | 5.48  | - | + | $\alpha$ -coixin | - |
| 262 | QHQLLQVNPL             | 10 | 1188.6615 | 0.26873  | 7.59  | 0  | 9.32  | - | - | $\alpha$ -coixin | - |
| 263 | TIAAQQQQQLPALSQL       | 17 | 1884.0105 | 0.268224 | 5.47  | 0  | 8.29  | - | - | $\alpha$ -coixin | - |
| 264 | QQPLAQLQQSSAHLTIQ      | 18 | 2018.0545 | 0.267551 | 7.59  | 0  | 13.06 | - | - | $\alpha$ -coixin | - |
| 265 | QHILPVLS               | 8  | 905.53345 | 0.265383 | 7.59  | 0  | 7.52  | - | + | $\alpha$ -coixin | - |
| 266 | SICENQILQPY            | 11 | 1363.6442 | 0.264459 | 3.14  | -1 | 10.3  | - | + | $\alpha$ -coixin | - |
| 267 | QILPVLSQL              | 9  | 1009.6172 | 0.264103 | 5.48  | 0  | 4.71  | - | + | $\alpha$ -coixin | - |
| 268 | LQVNPL                 | 6  | 682.40138 | 0.263602 | 5.58  | 0  | 6.7   | - | + | $\alpha$ -coixin | - |
| 269 | PPVSAI                 | 6  | 582.33771 | 0.261988 | 5.62  | 0  | 7.56  | - | + | $\alpha$ -coixin | - |
| 270 | QNQLLQVNPL             | 10 | 1165.6455 | 0.254267 | 5.48  | 0  | 7.84  | - | - | $\beta$ -coixin  | - |
| 271 | ICENQILQPY             | 10 | 1276.6122 | 0.250287 | 3.14  | -1 | 9.84  | - | + | $\alpha$ -coixin | - |
| 272 | QQLQQLVLP              | 9  | 1065.6182 | 0.248653 | 5.17  | 0  | 6.91  | - | + | $\alpha$ -coixin | - |
| 273 | IIQRFLPPVSAIGFEHPAVQAY | 22 | 2452.3267 | 0.247785 | 7.81  | 0  | 11.08 | - | - | $\alpha$ -coixin | - |
| 274 | GFEHPAVQ               | 8  | 883.41882 | 0.246026 | 5.06  | -1 | 14.25 | - | + | $\alpha$ -coixin | - |
| 275 | AVANPITYPAA            | 11 | 1086.571  | 0.24574  | 5.59  | 0  | 8.99  | - | - | $\alpha$ -coixin | - |
| 276 | LAVASPIASLQ            | 11 | 1068.6179 | 0.245371 | 5.44  | 0  | 7.15  | - | + | $\alpha$ -coixin | - |
| 277 | AIGFEHPAVQAY           | 12 | 1301.6404 | 0.242867 | 5.06  | -1 | 13.42 | - | + | $\alpha$ -coixin | - |
| 278 | QQPIVGAA               | 8  | 782.42865 | 0.241124 | 5.49  | 0  | 10.15 | - | - | $\alpha$ -coixin | - |
| 279 | QQPLAQLQ               | 8  | 924.50288 | 0.231566 | 5.35  | 0  | 9.12  | - | - | $\alpha$ -coixin | - |
| 280 | TCLANTARQAFQR          | 13 | 1535.7627 | 0.231049 | 10.67 | 2  | 12.93 | - | - | $\gamma$ -coixin | - |
| 281 | LAPTAAIIPQ             | 10 | 993.58588 | 0.22475  | 5.44  | 0  | 7.21  | - | + | $\alpha$ -coixin | - |
| 282 | HILPVLSEL              | 9  | 1019.6015 | 0.224448 | 5.06  | -1 | 9.13  | - | + | $\alpha$ -coixin | - |

|     |                              |    |           |          |       |    |       |   |   |                  |   |
|-----|------------------------------|----|-----------|----------|-------|----|-------|---|---|------------------|---|
| 283 | AIGFEHPAVQ                   | 10 | 1067.54   | 0.224209 | 5.06  | -1 | 13.63 | - | + | $\alpha$ -coixin | - |
| 284 | GCQPPHLPPPVHLPPPVHLPPPVHLPPQ | 30 | 3244.7484 | 0.223271 | 7.49  | 0  | 15.61 | - | - | $\gamma$ -coixin | - |
| 285 | QSLVVIL                      | 7  | 770.49019 | 0.222944 | 5.48  | 0  | 4.59  | - | + | $\alpha$ -coixin | - |
| 286 | SSAHLTIQ                     | 8  | 855.44503 | 0.221893 | 7.63  | 0  | 10.3  | - | + | $\alpha$ -coixin | - |
| 287 | QELLPT                       | 6  | 699.38031 | 0.221159 | 3.08  | -1 | 10.19 | - | - | $\alpha$ -coixin | - |
| 288 | QQILPVLS                     | 8  | 896.53312 | 0.218574 | 5.37  | 0  | 5.96  | - | + | $\alpha$ -coixin | - |
| 289 | QILPVLS                      | 7  | 768.47454 | 0.21638  | 5.37  | 0  | 5.19  | - | + | $\alpha$ -coixin | - |
| 290 | HQLLQVNPL                    | 9  | 1060.6029 | 0.215952 | 7.69  | 0  | 8.55  | - | - | $\alpha$ -coixin | - |
| 291 | RLQQALAASIL                  | 11 | 1182.7085 | 0.213211 | 10.73 | 1  | 8.34  | - | - | $\alpha$ -coixin | - |
| 292 | IGFEHPAVQ                    | 9  | 996.50288 | 0.21196  | 5.06  | -1 | 13.13 | - | + | $\alpha$ -coixin | - |
| 293 | LQQILPVLS                    | 9  | 1009.6172 | 0.211703 | 5.45  | 0  | 4.71  | - | + | $\alpha$ -coixin | - |
| 294 | AVASPIA                      | 7  | 627.35918 | 0.211456 | 5.61  | 0  | 8.42  | - | + | $\alpha$ -coixin | - |
| 295 | TIPQYLPSVVATRFEYPVSQSH       | 22 | 2518.2856 | 0.210912 | 7.53  | 0  | 13.13 | - | - | $\alpha$ -coixin | - |
| 296 | ARVNPA                       | 6  | 626.35001 | 0.199462 | 11.18 | 1  | 11.24 | - | - | $\alpha$ -coixin | - |
| 297 | NQLLQVNPL                    | 9  | 1037.5869 | 0.199334 | 5.36  | 0  | 7.07  | - | + | $\beta$ -coixin  | - |
| 298 | FEHPAVQ                      | 7  | 826.39735 | 0.197038 | 5.06  | -1 | 13.1  | - | + | $\alpha$ -coixin | - |
| 299 | VASPI                        | 5  | 485.28495 | 0.196285 | 5.57  | 0  | 7.42  | - | + | $\alpha$ -coixin | - |
| 300 | FLPTVSAIGFEHPAVQ             | 16 | 1711.8934 | 0.195859 | 5.06  | -1 | 11.06 | - | - | $\alpha$ -coixin | - |
| 301 | ENQILQPY                     | 8  | 1003.4975 | 0.193519 | 3.14  | -1 | 10.98 | - | + | $\alpha$ -coixin | - |
| 302 | INLQILPQ                     | 8  | 937.55967 | 0.188386 | 5.44  | 0  | 5.69  | - | + | $\alpha$ -coixin | - |
| 303 | NAVYQQQHQLLQVNPL             | 16 | 1891.9904 | 0.188232 | 7.37  | 0  | 11.04 | - | - | $\alpha$ -coixin | - |
| 304 | VVANPL                       | 6  | 611.36426 | 0.185647 | 5.58  | 0  | 7.22  | - | + | $\alpha$ -coixin | - |
| 305 | TVAFLQ                       | 6  | 677.37483 | 0.182791 | 5.35  | 0  | 6     | - | + | $\alpha$ -coixin | - |
| 306 | FEYPVSQ                      | 7  | 868.39668 | 0.181817 | 3.12  | -1 | 10.02 | - | + | $\alpha$ -coixin | - |
| 307 | RFEYPVSQ                     | 8  | 1024.4978 | 0.180643 | 6.49  | 0  | 11.83 | - | + | $\alpha$ -coixin | - |
| 308 | VGFEHPAVQ                    | 9  | 982.48723 | 0.177278 | 5.06  | -1 | 13.79 | - | + | $\alpha$ -coixin | - |
| 309 | AVANPA                       | 6  | 541.28601 | 0.176105 | 5.61  | 0  | 9.93  | - | + | $\alpha$ -coixin | - |
| 310 | EHPAVR                       | 6  | 707.37147 | 0.17596  | 7.76  | 0  | 15.85 | - | + | $\alpha$ -coixin | - |
| 311 | PPVSAV                       | 6  | 568.32206 | 0.172618 | 5.69  | 0  | 8.22  | - | + | $\alpha$ -coixin | - |

|     |                             |    |           |           |       |    |       |   |   |                  |   |
|-----|-----------------------------|----|-----------|-----------|-------|----|-------|---|---|------------------|---|
| 312 | NAVYQQQHQLL                 | 11 | 1340.6837 | 0.171936  | 7.37  | 0  | 10.99 | - | - | $\alpha$ -coixin | - |
| 313 | VIIPQ                       | 5  | 568.35845 | 0.169077  | 5.44  | 0  | 6.11  | - | + | $\alpha$ -coixin | - |
| 314 | RLQQTLAGSIL                 | 11 | 1198.7034 | 0.168165  | 10.73 | 1  | 8.74  | - | + | $\alpha$ -coixin | - |
| 315 | CSPVTTTIPQYLPVSVVATRFEYPVSQ | 26 | 2939.4739 | 0.157301  | 6.17  | 0  | 10.96 | - | + | $\alpha$ -coixin | - |
| 316 | QTLGSIL                     | 8  | 801.45962 | 0.155205  | 5.48  | 0  | 7.41  | - | - | $\alpha$ -coixin | - |
| 317 | NAVYEQQHQLL                 | 11 | 1341.6677 | 0.153314  | 5.06  | -1 | 13.85 | - | + | $\alpha$ -coixin | - |
| 318 | TSICENQILQPY                | 12 | 1464.6919 | 0.144804  | 3.14  | -1 | 10.55 | - | - | $\alpha$ -coixin | - |
| 319 | AVANPNSYLQQQ                | 12 | 1331.647  | 0.141372  | 5.43  | 0  | 11.09 | - | - | $\alpha$ -coixin | - |
| 320 | AAIIPRFLAPVSAIGFEHPAVQ      | 22 | 2303.279  | 0.141196  | 7.95  | 0  | 12.02 | - | - | $\beta$ -coixin  | - |
| 321 | AAIIPRFLPPVSAIGFEHPAVQ      | 22 | 2329.2947 | 0.137973  | 7.95  | 0  | 11.66 | - | - | $\alpha$ -coixin | - |
| 322 | NNAVYEQQHQLL                | 12 | 1455.7106 | 0.137754  | 5.06  | -1 | 14.7  | - | - | $\alpha$ -coixin | - |
| 323 | TGFEHPAVQ                   | 9  | 984.46649 | 0.133578  | 5.06  | -1 | 14.5  | - | + | $\alpha$ -coixin | - |
| 324 | AAIIPRFLPPVSAVGFEHPAVQAY    | 24 | 2549.3795 | 0.13159   | 7.85  | 0  | 12.11 | - | - | $\alpha$ -coixin | - |
| 325 | SHRLQEALAA                  | 10 | 1094.5833 | 0.128898  | 7.63  | 0  | 15.9  | - | - | $\alpha$ -coixin | - |
| 326 | SSAHLTIQTIAAQQQQQLPSLS      | 23 | 2496.2973 | 0.127827  | 7.63  | 0  | 11.13 | - | - | $\alpha$ -coixin | - |
| 327 | TIPQYLPVSVVATRFEYPVSQ       | 20 | 2294.1947 | 0.127024  | 6.52  | 0  | 10.34 | - | - | $\alpha$ -coixin | - |
| 328 | AAIIPRFLPPVSAIGFEHPAVQAY    | 24 | 2563.3951 | 0.120425  | 7.85  | 0  | 11.45 | - | - | $\alpha$ -coixin | - |
| 329 | IHDKGPTAS                   | 9  | 924.46649 | 0.11958   | 7.87  | 0  | 18.05 | - | - | $\gamma$ -coixin | - |
| 330 | TATIIPQ                     | 7  | 742.4225  | 0.112635  | 5.35  | 0  | 7.57  | - | + | $\alpha$ -coixin | - |
| 331 | AAIIPQLPTVSAIGFEHPAVQ       | 22 | 2305.2471 | 0.105346  | 5.06  | -1 | 10.73 | - | - | $\alpha$ -coixin | - |
| 332 | AFQRTPDYVEEA                | 12 | 1424.6572 | 0.10445   | 3.74  | -2 | 19.89 | - | - | $\gamma$ -coixin | - |
| 333 | EHPAVQ                      | 6  | 679.32894 | 0.0993281 | 5.06  | -1 | 14.81 | - | + | $\alpha$ -coixin | - |
| 334 | EHPAVQA                     | 7  | 750.36605 | 0.0974816 | 5.06  | -1 | 15.31 | - | + | $\alpha$ -coixin | - |
| 335 | NAVYEQQHQLLQ                | 12 | 1469.7263 | 0.0945529 | 5.06  | -1 | 14.62 | - | - | $\alpha$ -coixin | - |
| 336 | EYPVSQ                      | 6  | 721.32827 | 0.0835248 | 3.12  | -1 | 11.73 | - | + | $\alpha$ -coixin | - |
| 337 | TPDYVEE                     | 7  | 851.35488 | 0.0757859 | 2.79  | -3 | 18.02 | - | + | $\gamma$ -coixin | - |
| 338 | TPDYVEEA                    | 8  | 922.39199 | 0.0724375 | 2.91  | -3 | 18.52 | - | + | $\gamma$ -coixin | - |
| 339 | QRTPDYVEEA                  | 10 | 1206.5517 | 0.0699371 | 3.74  | -2 | 21.1  | - | + | $\gamma$ -coixin | - |
| 340 | QRTPDYVEE                   | 9  | 1135.5146 | 0.0697131 | 3.73  | -2 | 20.6  | - | - | $\gamma$ -coixin | - |

|     |                       |    |           |           |      |    |       |   |   |                  |   |
|-----|-----------------------|----|-----------|-----------|------|----|-------|---|---|------------------|---|
| 341 | VVANPAAYLQQLFSSNPVSTA | 22 | 2304.175  | 0.0628216 | 5.58 | 0  | 9.52  | - | + | $\alpha$ -coixin | - |
| 342 | RTPDYVEEA             | 9  | 1078.4931 | 0.0619354 | 3.74 | -2 | 20.33 | - | - | $\gamma$ -coixin | - |
| 343 | QEIAIE                | 6  | 659.31262 | 0.0602902 | 2.92 | -2 | 15.81 | - | + | $\alpha$ -coixin | - |
